# Supplementary material
Source: MDPI journal article supplement (https://www.mdpi.com/2076-3417/12/4/2135)

## Supplementary Material

### 1. Variance Accounted For (overall and per muscle) values per subjects.

#### Left outward directed perturbations:

| Subject    | VAF <sub>overall</sub> (%) |         | VAF <sub>per muscle</sub> (%) |         |
|------------|----------------------------|---------|-------------------------------|---------|
|            | Average                    | Minimum | Average                       | Minimum |
| Subject 01 | 93.51 ± 0.99               | 92.42   | 93.54 ± 5.15                  | 66.84   |
| Subject 02 | 91.82 ± 3.98               | 84.96   | 91.89 ± 7.80                  | 29.77   |
| Subject 03 | 92.94 ± 1.95               | 89.12   | 92.90 ± 4.86                  | 76.78   |
| Subject 04 | 93.54 ± 1.24               | 91.55   | 93.90 ± 4.56                  | 71.09   |
| Subject 05 | 93.84 ± 1.38               | 92.01   | 93.36 ± 4.94                  | 68.47   |
| Subject 06 | 92.29 ± 1.94               | 89.47   | 91.68 ± 5.51                  | 75.10   |
| Subject 07 | 92.87 ± 1.89               | 88.07   | 92.88 ± 5.01                  | 60.12   |
| Subject 08 | 91.34 ± 1.40               | 88.28   | 91.30 ± 4.75                  | 72.62   |
| Subject 09 | 92.62 ± 1.64               | 88.41   | 92.90 ± 4.27                  | 75.82   |
| Subject 10 | 90.12 ± 2.95               | 83.09   | 90.58 ± 6.30                  | 52.70   |
| Subject 11 | 93.17 ± 1.26               | 91.02   | 92.84 ± 5.14                  | 71.57   |
| Subject 11 | 94.05 ± 1.51               | 90.63   | 94.55 ± 3.43                  | 80.04   |

#### Left inward directed perturbations:

| Subject    | VAF <sub>overall</sub> (%) |         | VAF <sub>per muscle</sub> (%) |         |
|------------|----------------------------|---------|-------------------------------|---------|
|            | Average                    | Minimum | Average                       | Minimum |
| Subject 01 | 94.00 ± 1.19               | 91.63   | 93.61 ± 4.81                  | 68.98   |
| Subject 02 | 91.93 ± 5.41               | 76.10   | 92.55 ± 5.37                  | 73.19   |
| Subject 03 | 92.34 ± 1.06               | 91.27   | 92.24 ± 5.68                  | 70.13   |
| Subject 04 | 94.21 ± 1.23               | 92.30   | 94.03 ± 4.47                  | 78.55   |
| Subject 05 | 93.36 ± 1.88               | 89.29   | 93.86 ± 4.57                  | 68.86   |
| Subject 06 | 91.60 ± 2.27               | 85.96   | 91.07 ± 5.62                  | 71.93   |
| Subject 07 | 90.81 ± 2.94               | 83.33   | 92.47 ± 5.41                  | 70.18   |
| Subject 08 | 92.22 ± 1.84               | 89.30   | 90.95 ± 6.30                  | 54.06   |
| Subject 09 | 91.15 ± 3.23               | 84.32   | 92.88 ± 4.83                  | 71.99   |
| Subject 10 | 89.47 ± 1.98               | 87.20   | 89.86 ± 7.46                  | 52.67   |
| Subject 11 | 93.84 ± 0.73               | 92.46   | 93.12 ± 4.76                  | 77.01   |
| Subject 11 | 93.68 ± 2.75               | 87.48   | 94.26 ± 3.83                  | 80.70   |

## 2. Muscle synergies and weighting curves for LEFT OUTWARD directed perturbations. Subject 01

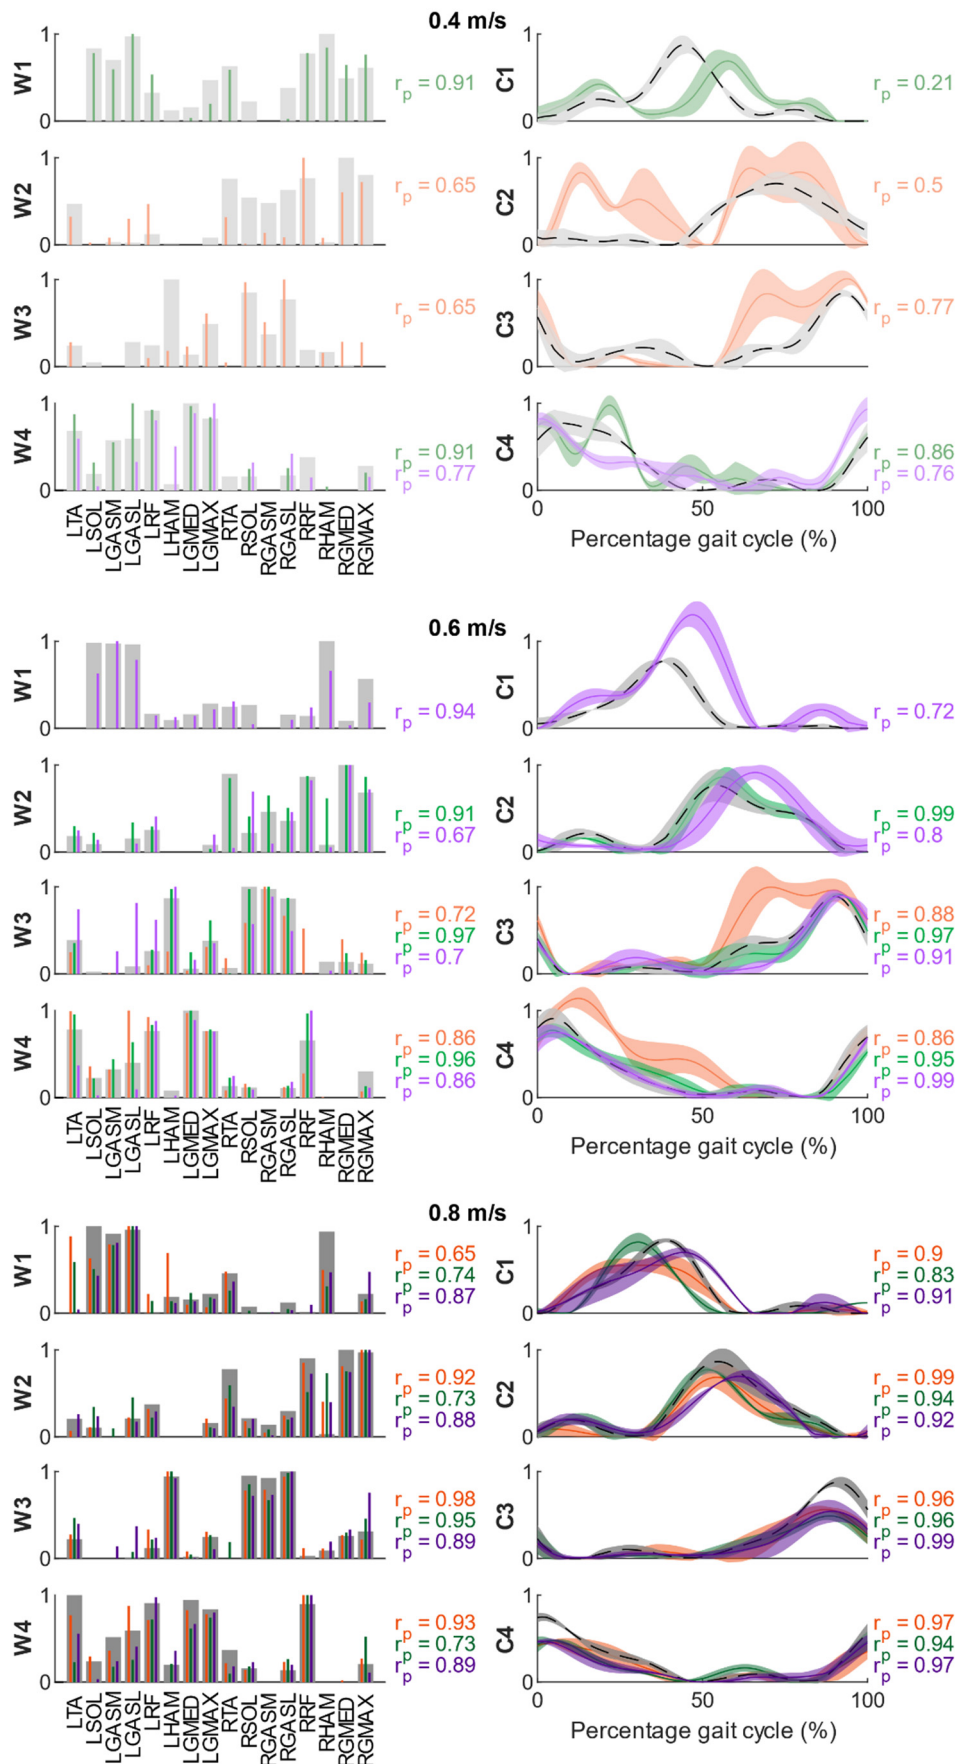

## Subject 02

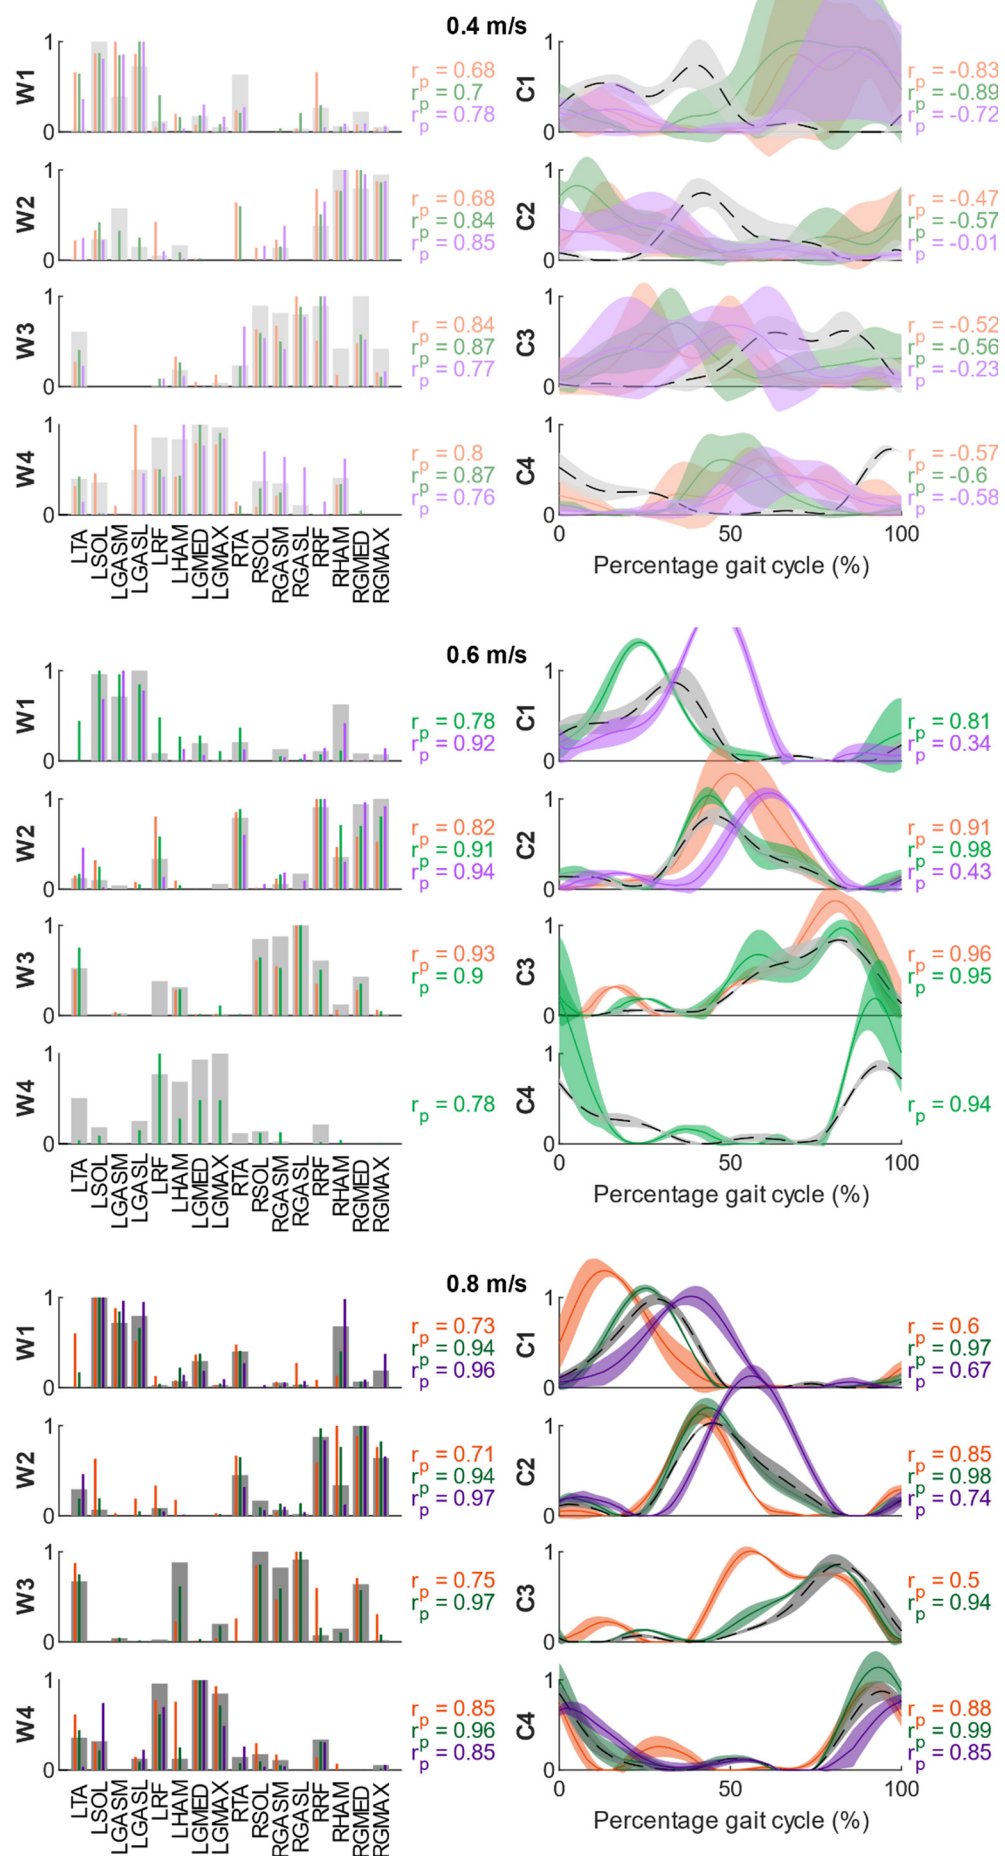

## Subject 03

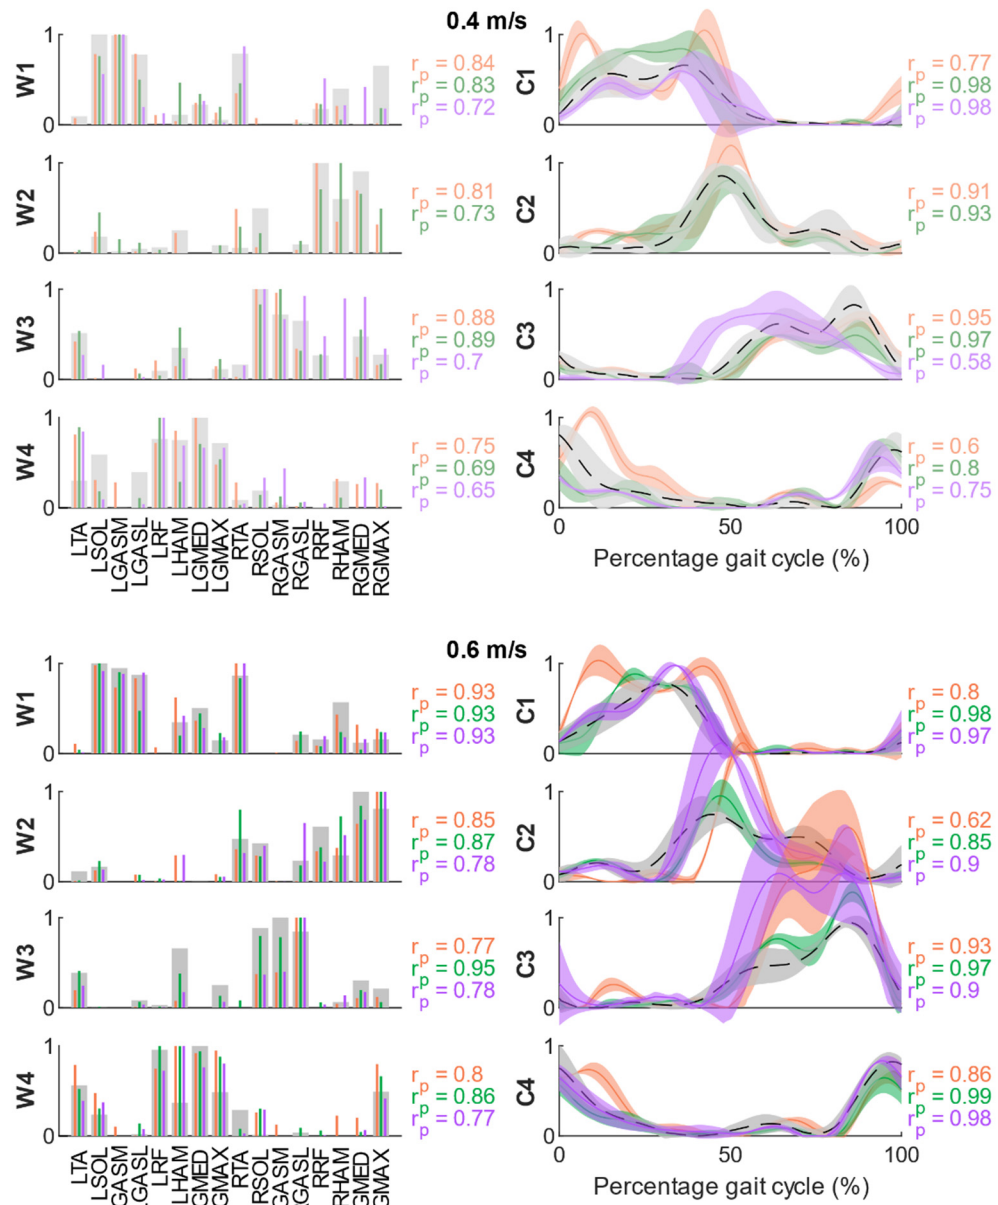



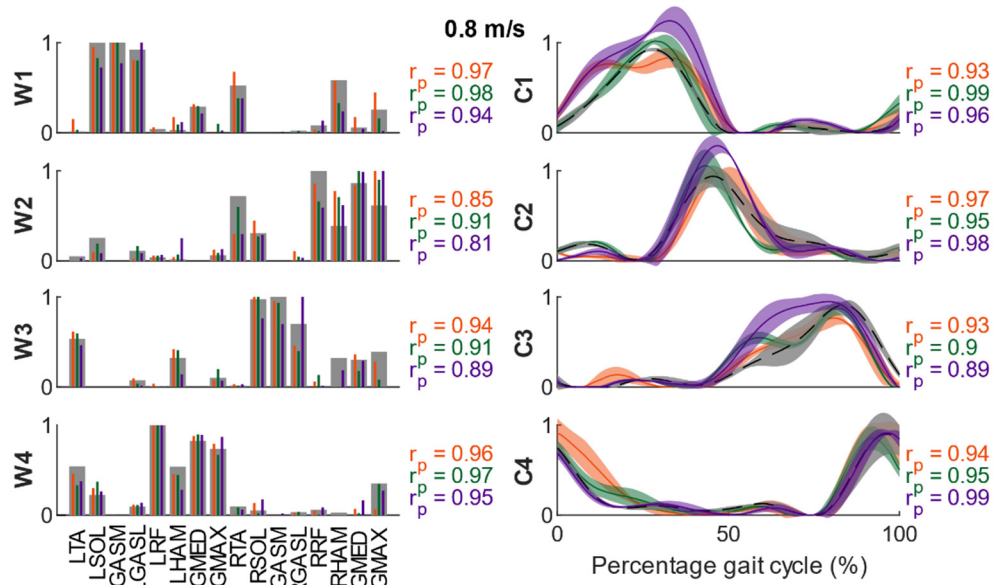

## Subject 04

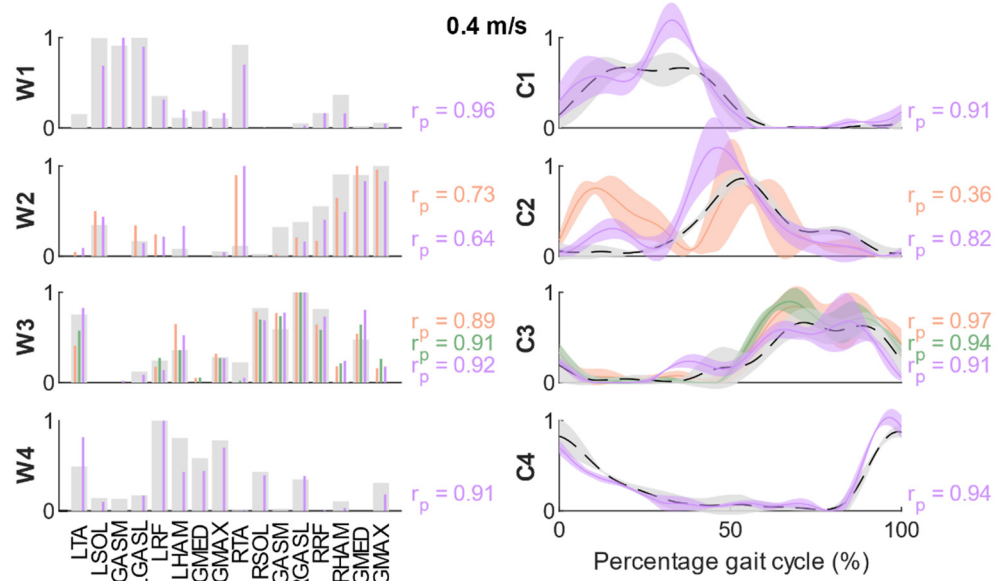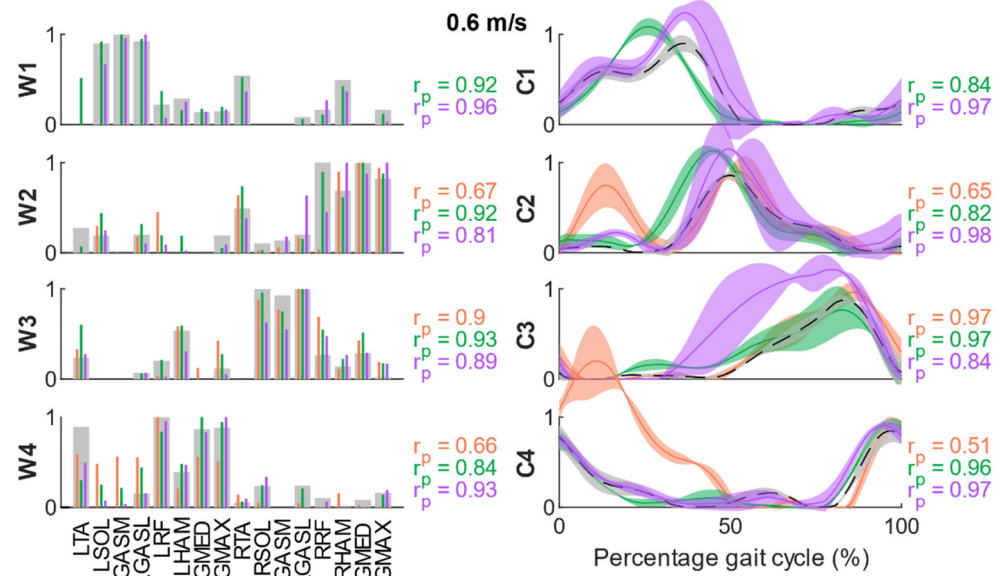

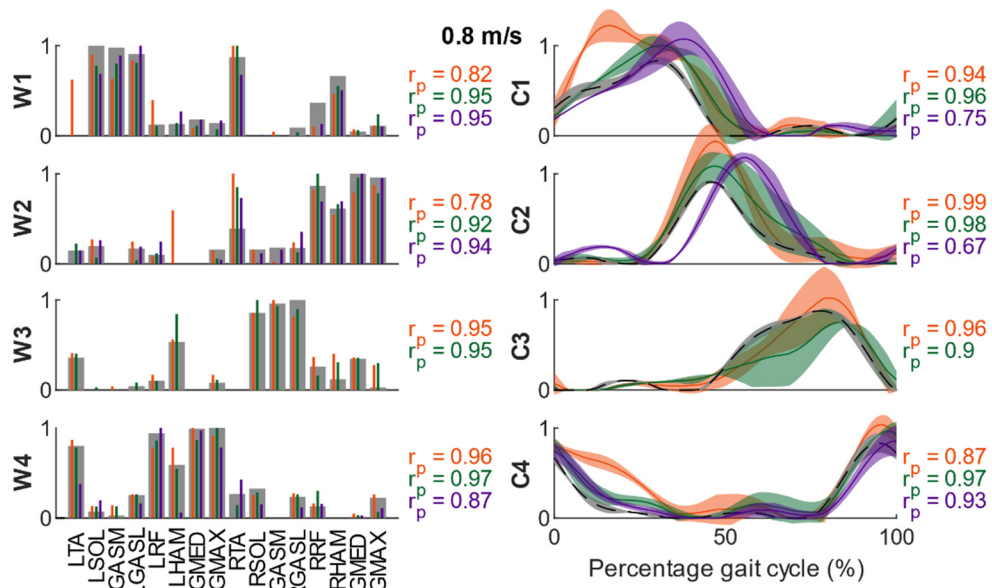

Subject 05

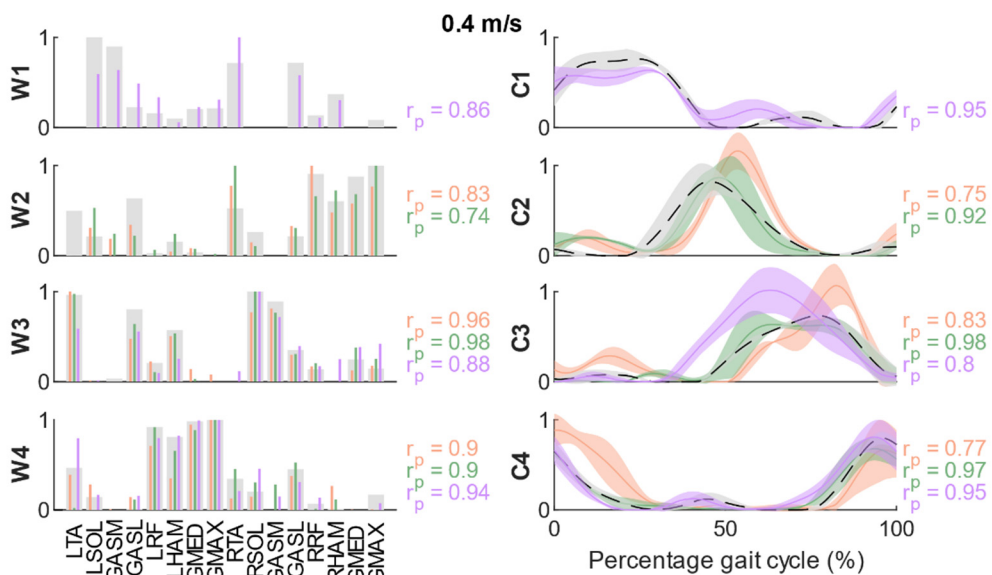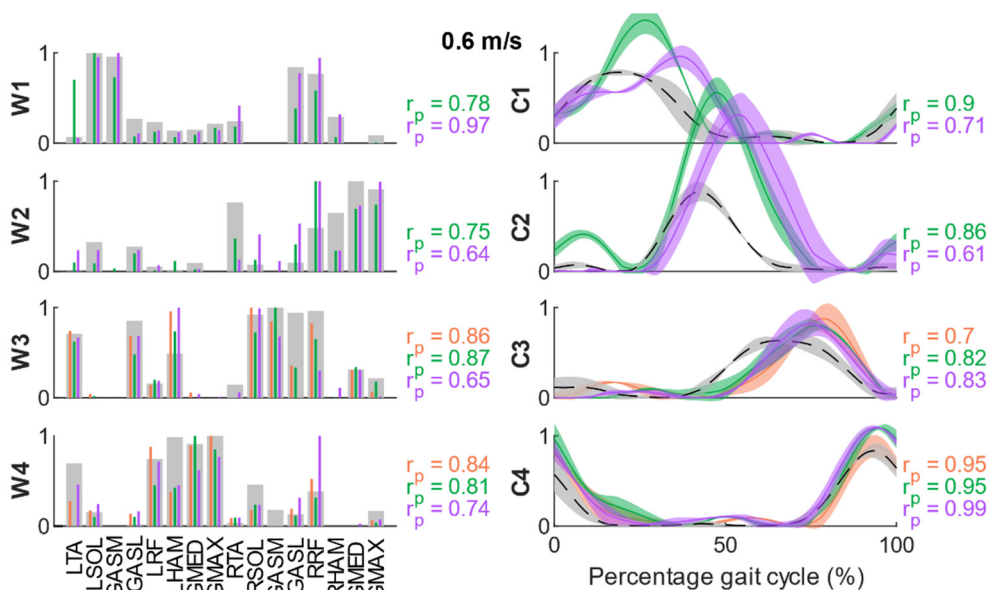

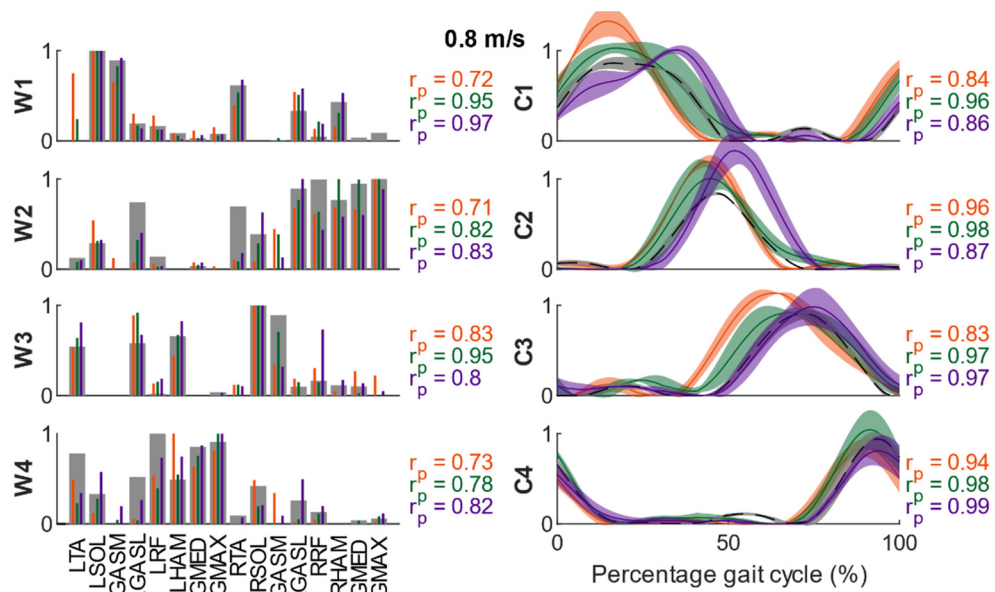

Subject 06

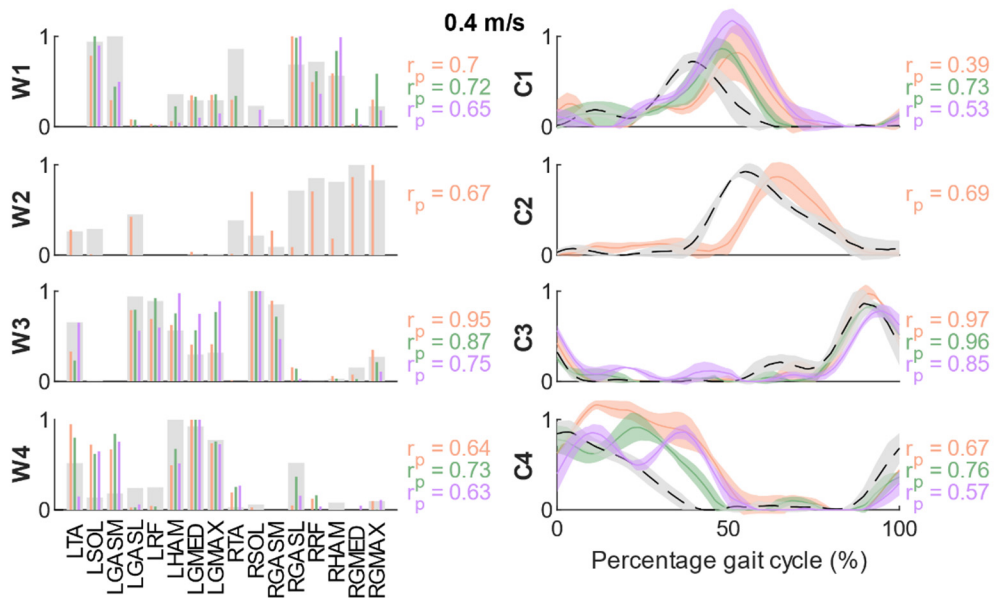

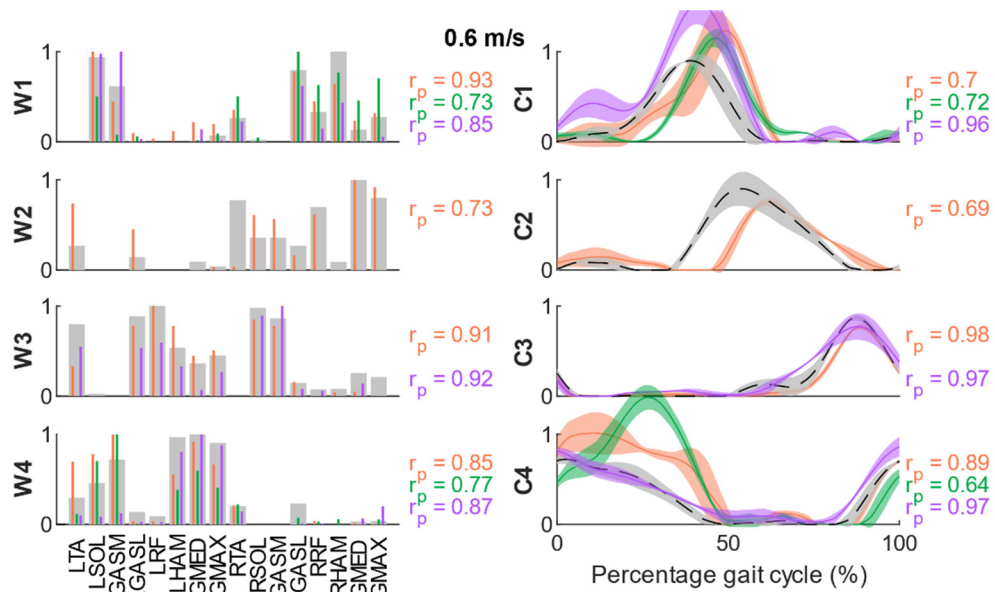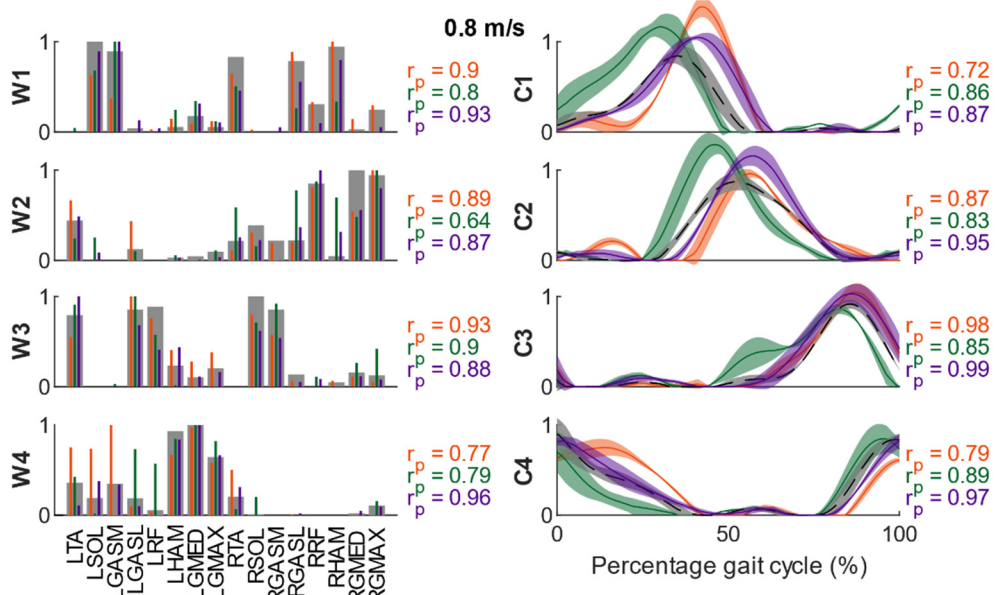

Subject 07

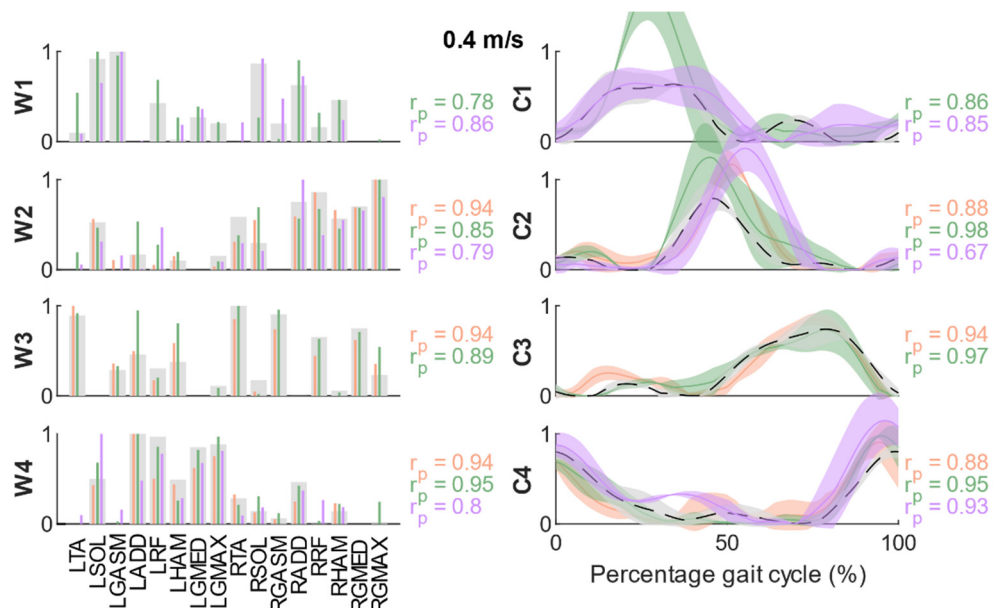



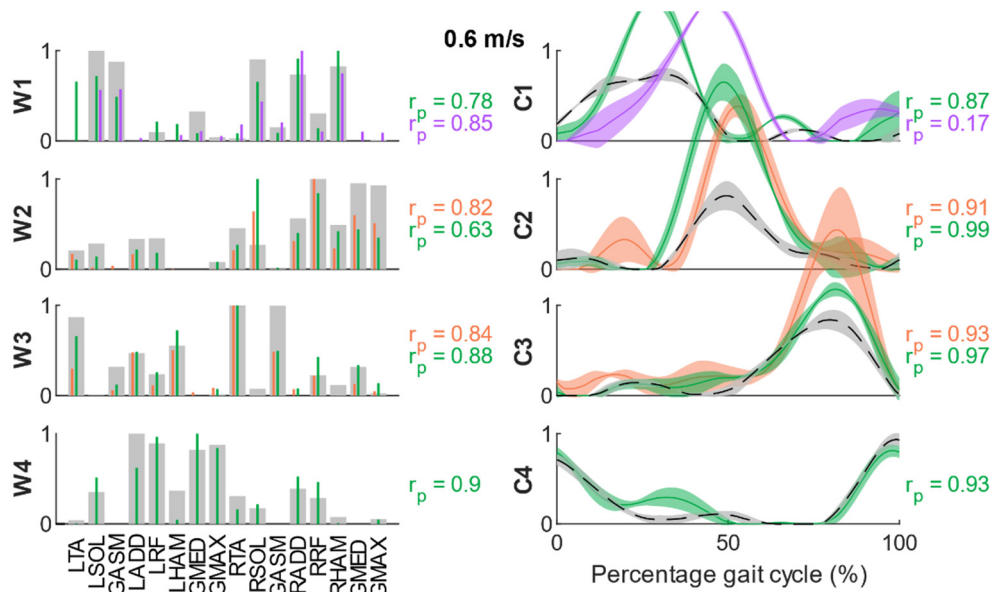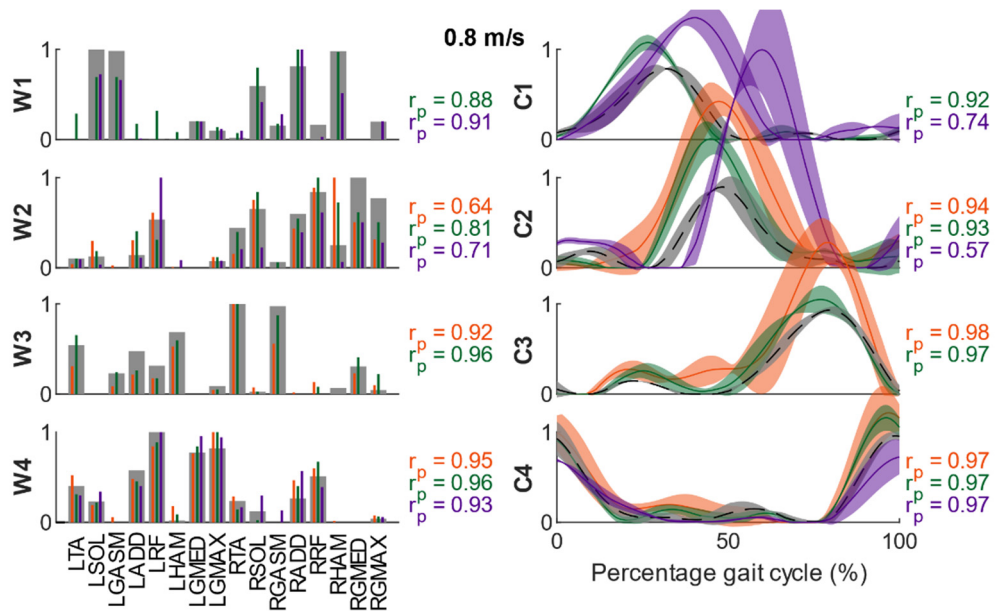

Subject 08

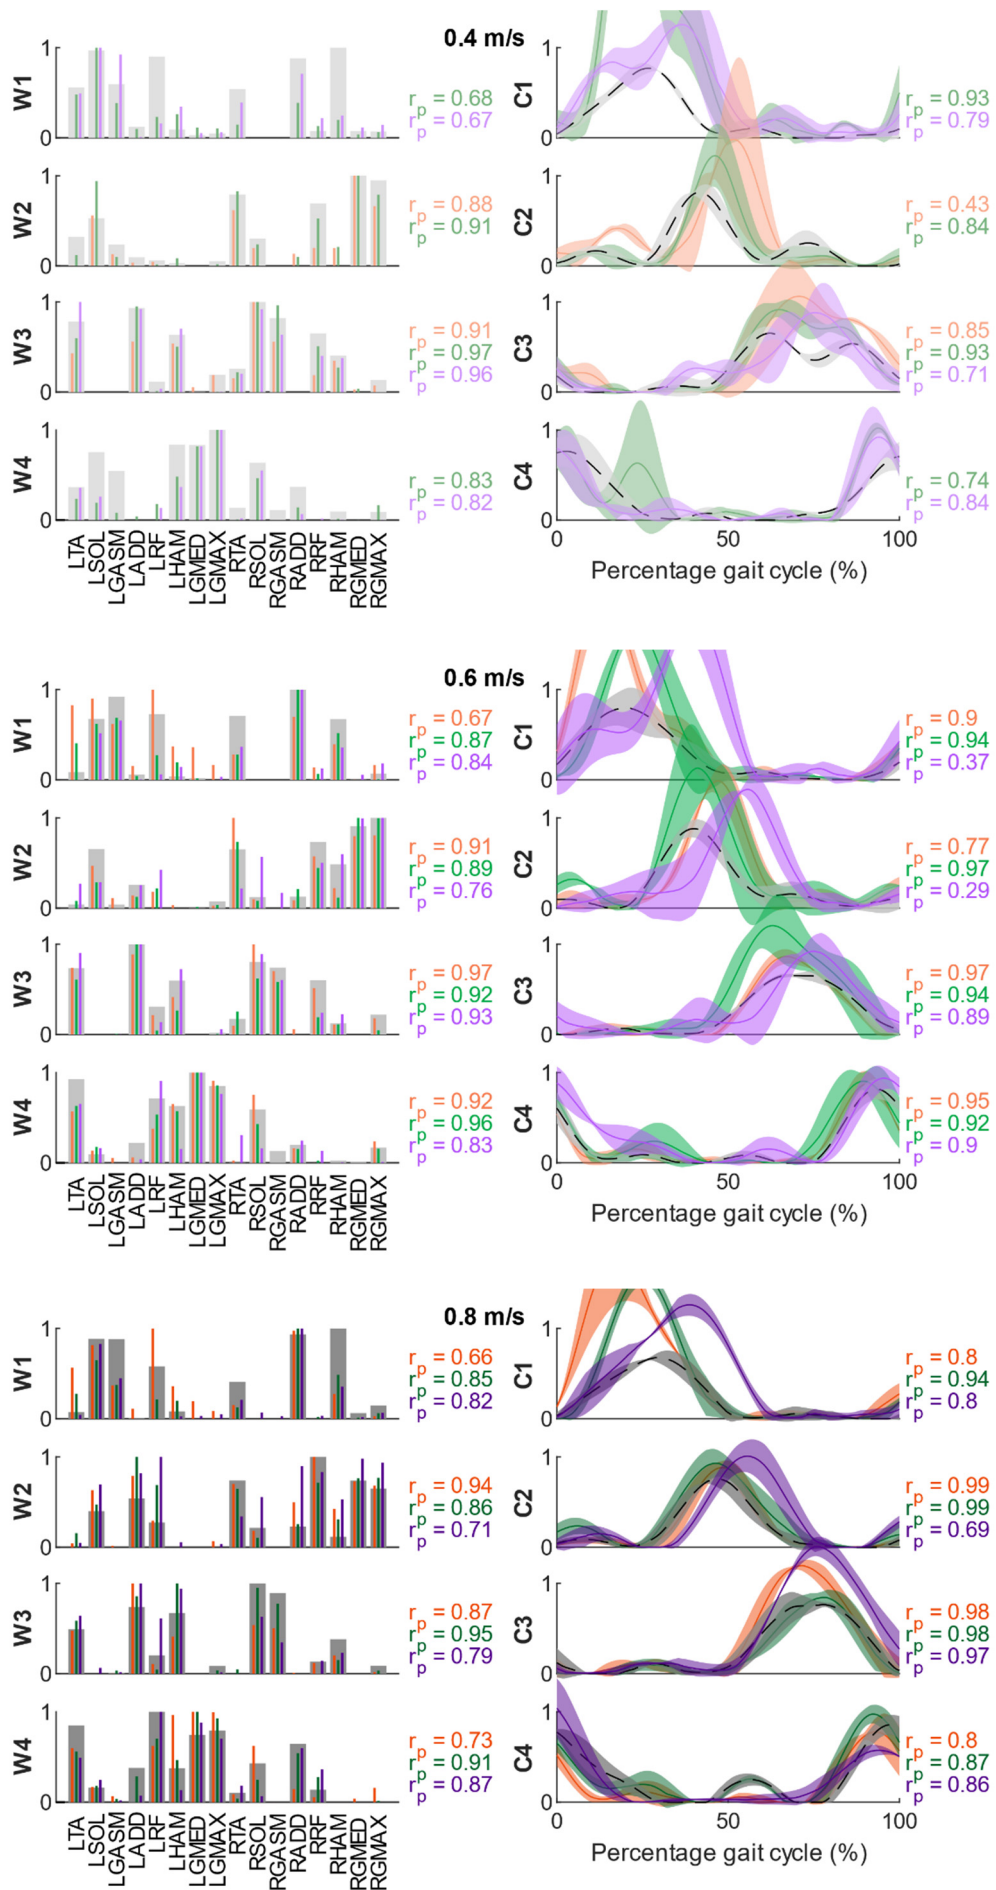

## Subject 09

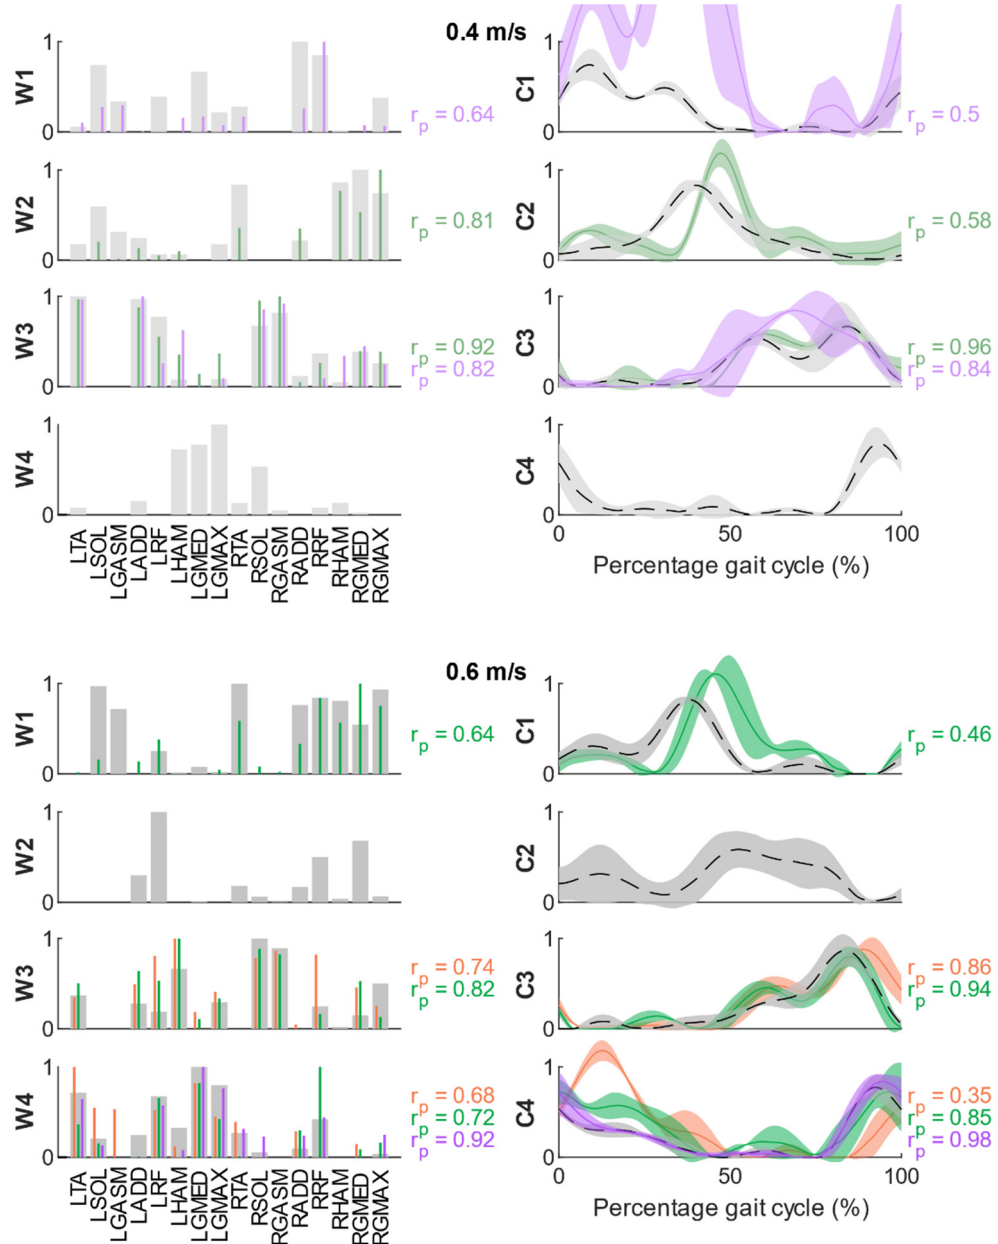

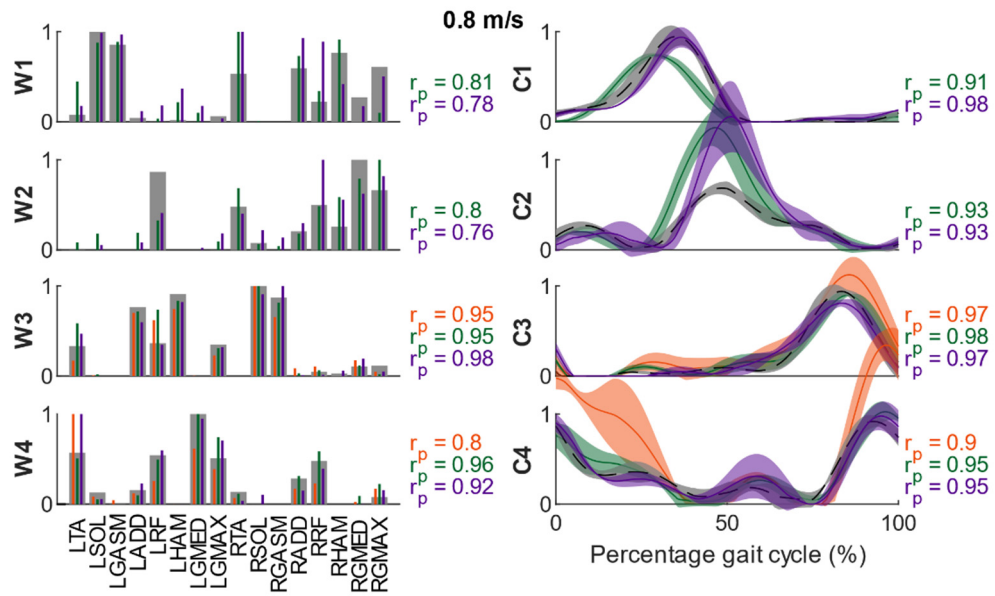

Subject 10

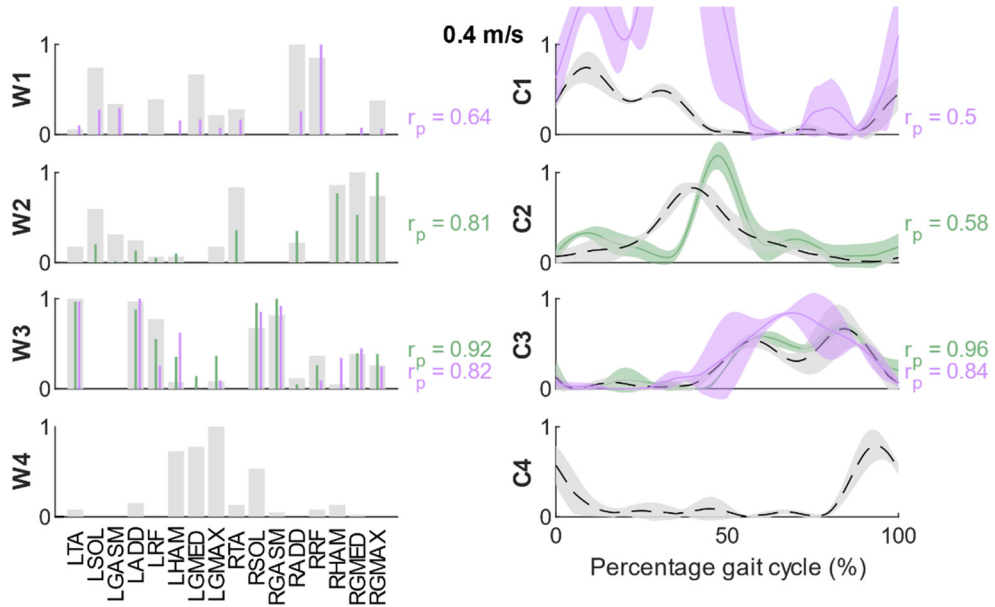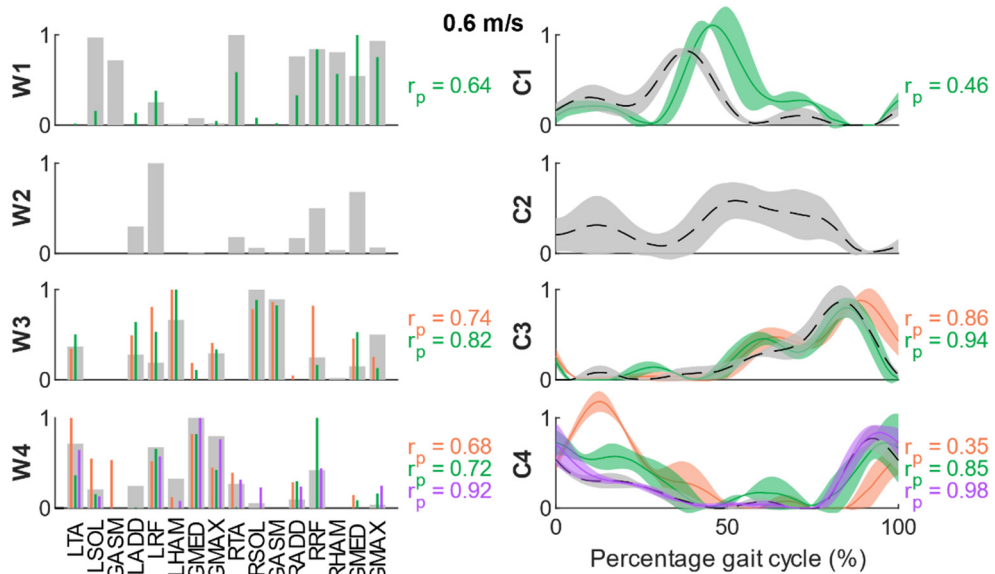

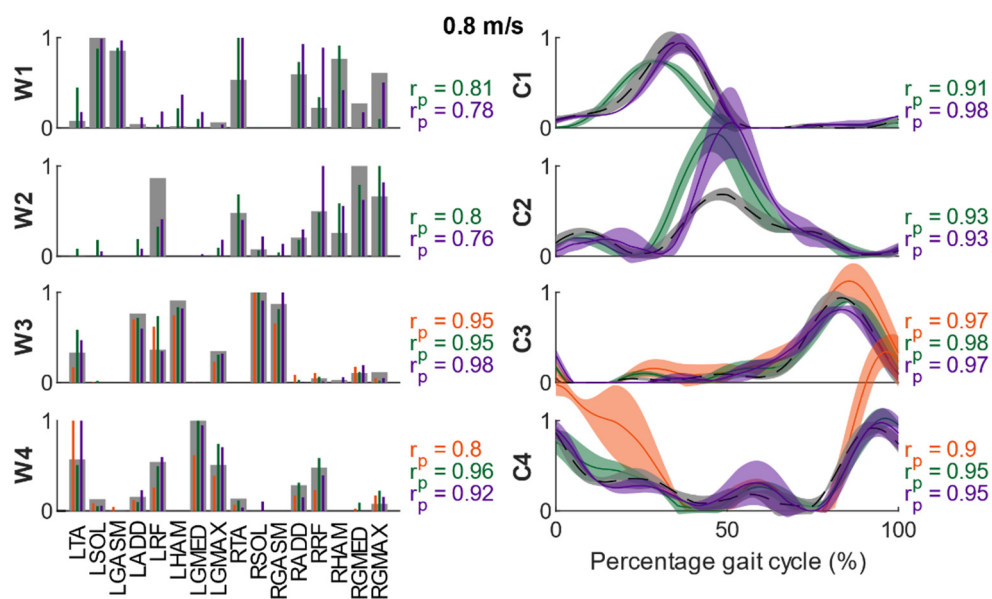

Subject 11

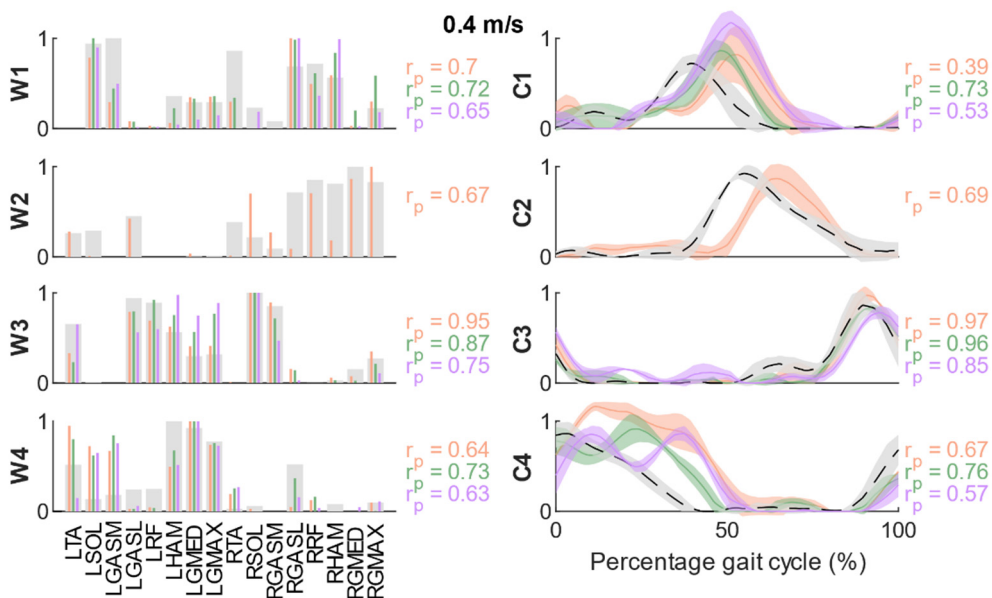



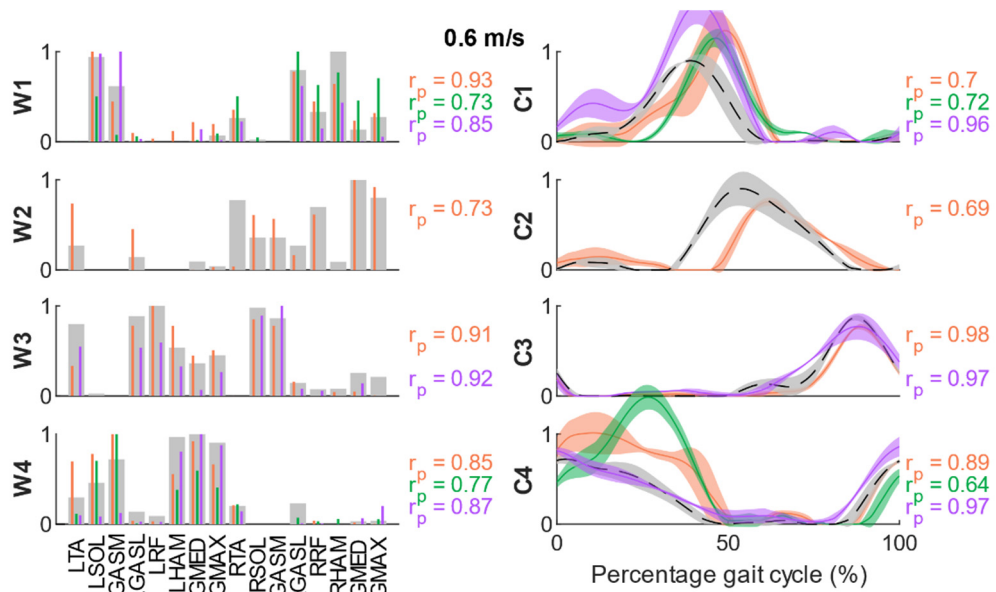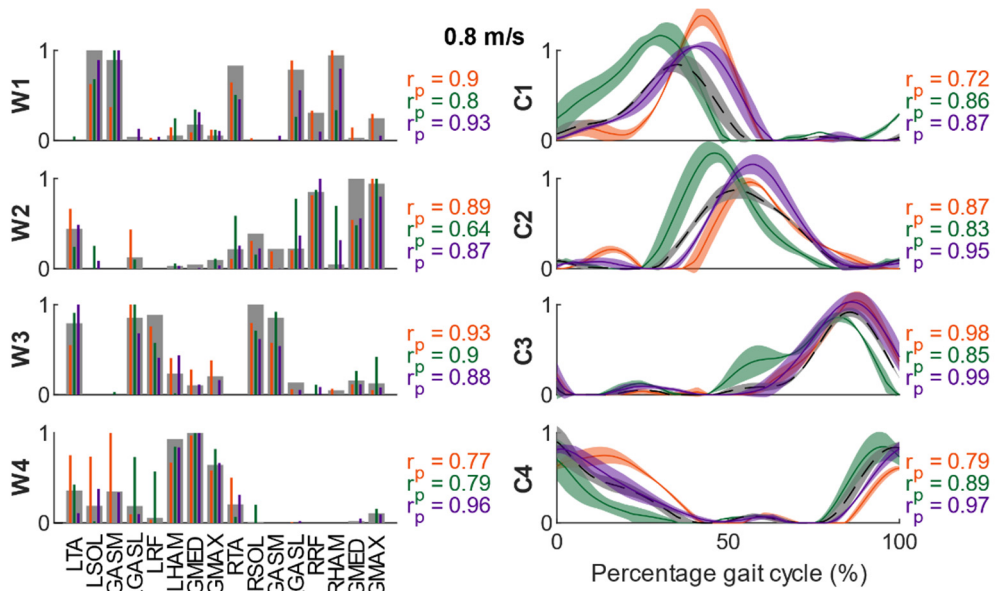

Subject 12

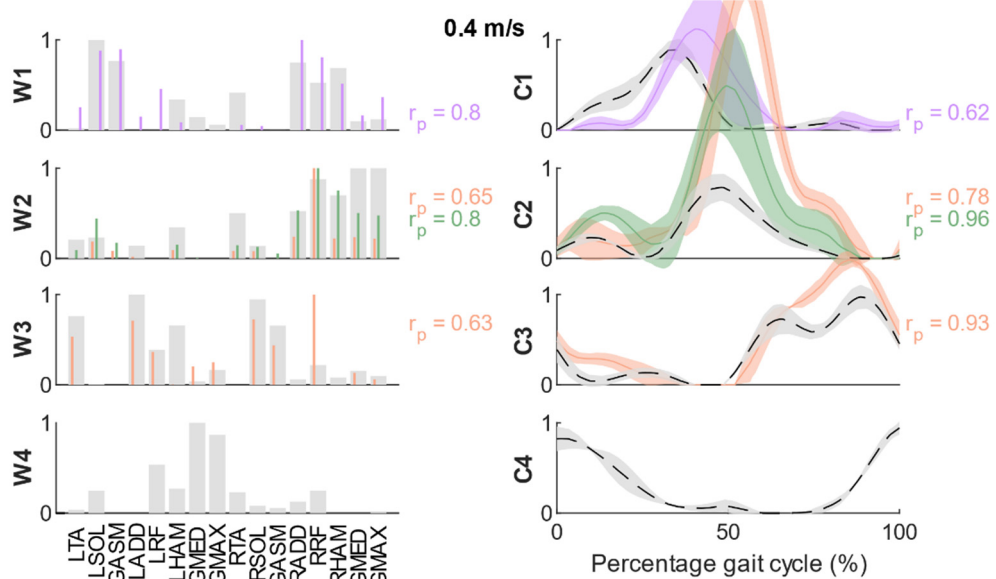

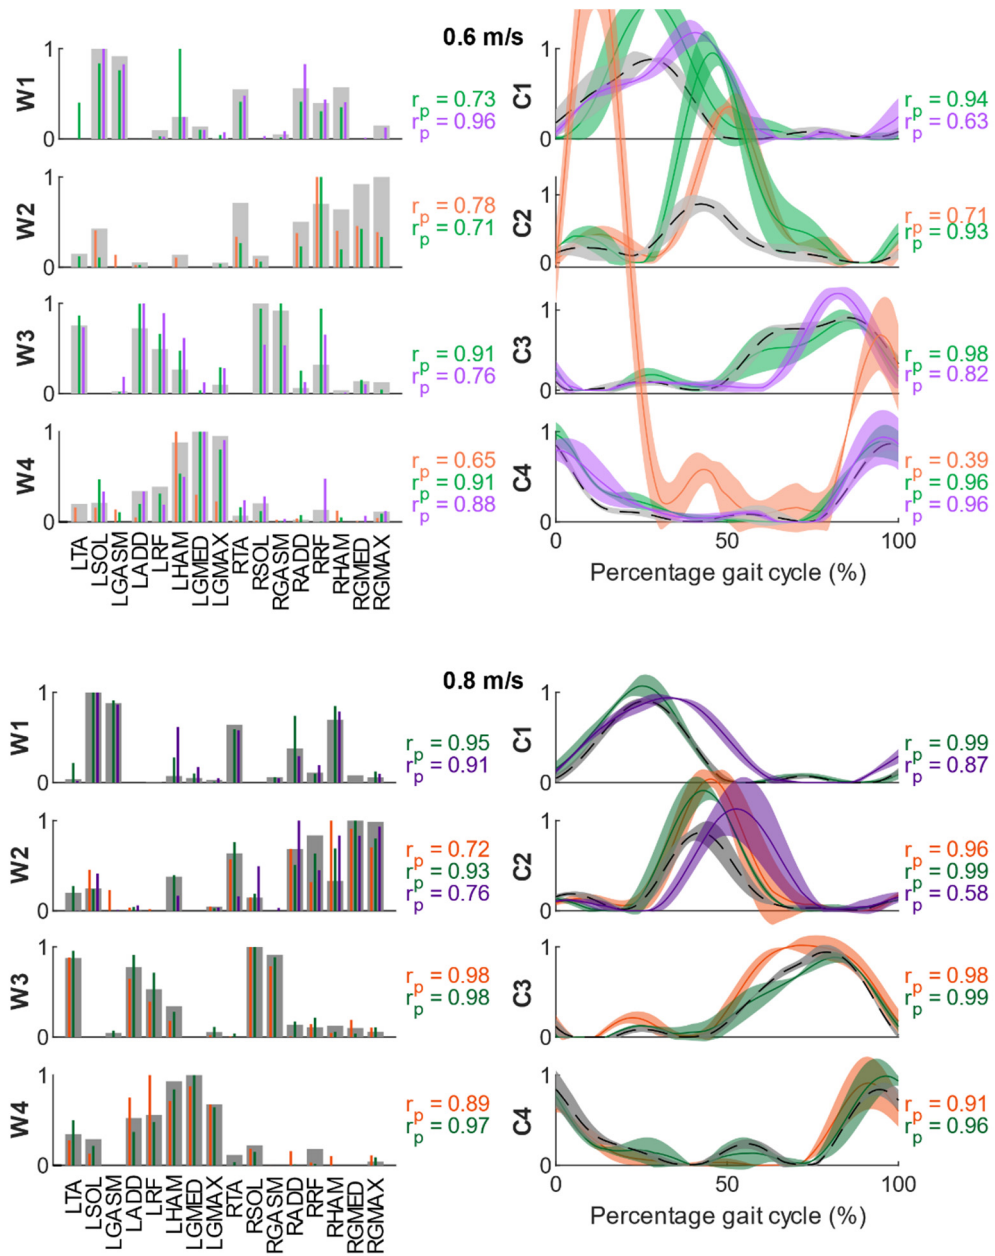

3. Muscle synergies and weighting curves for LEFT INWARD directed perturbations.  
Subject 01

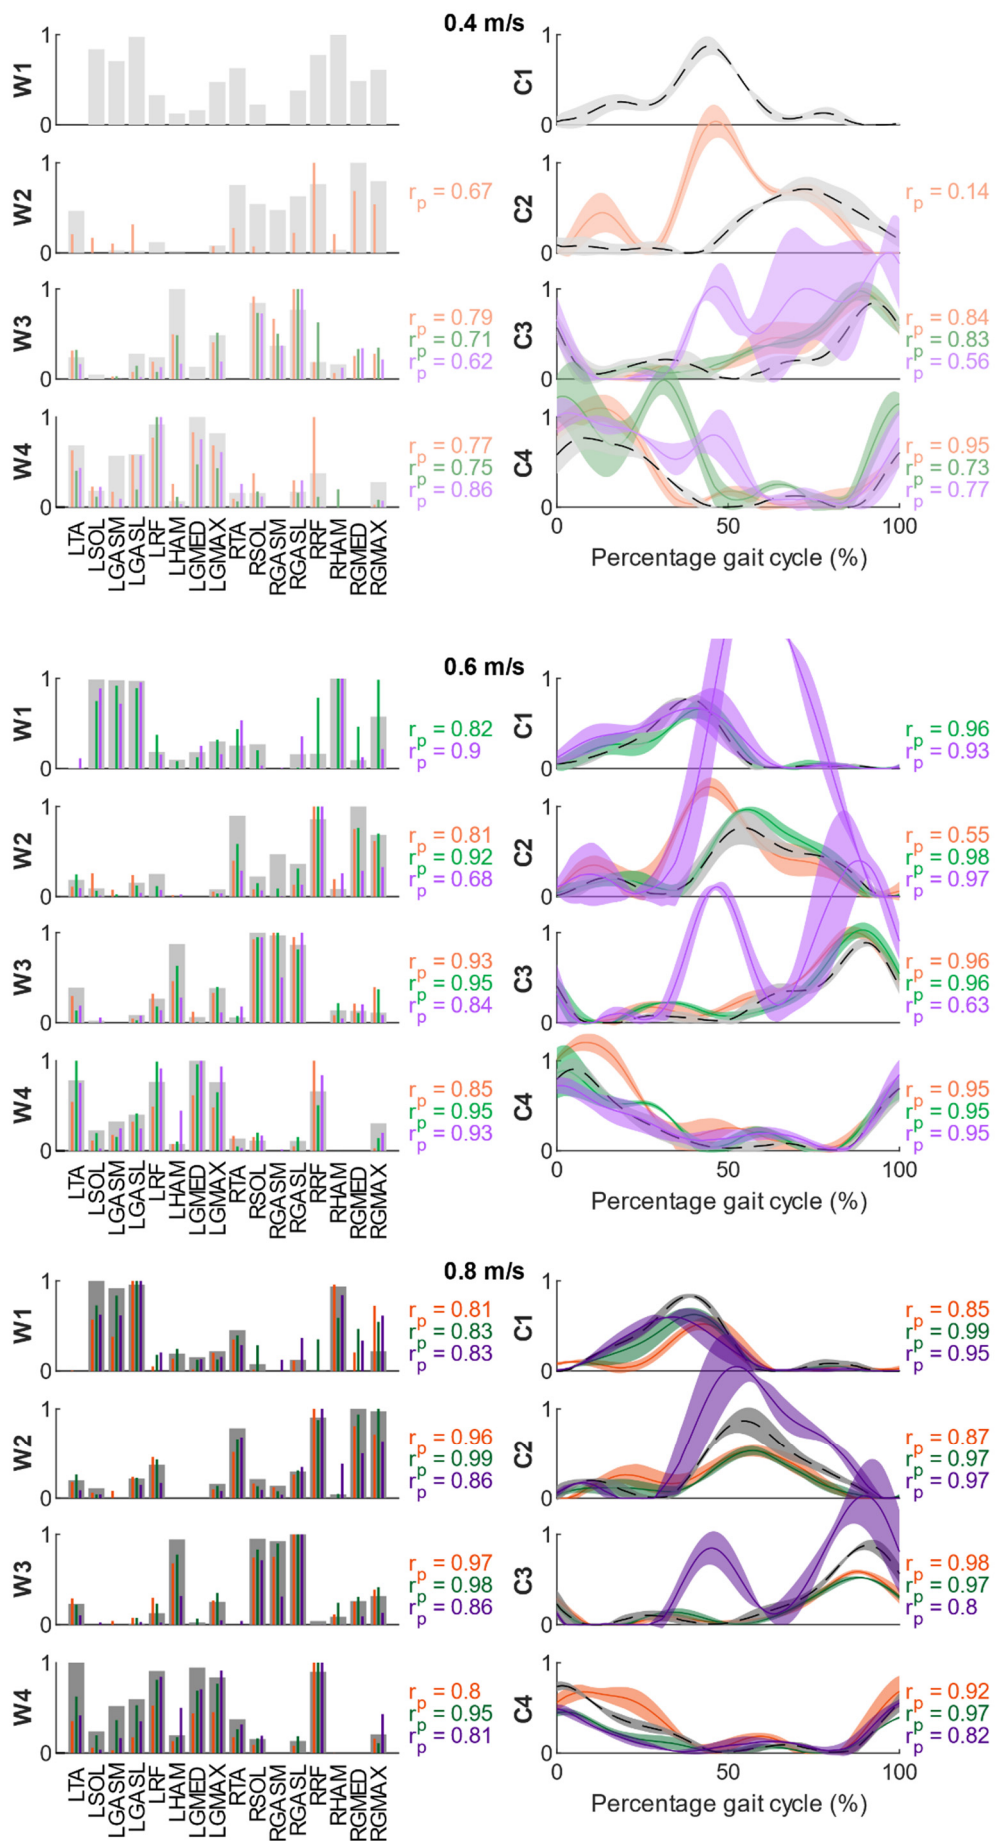

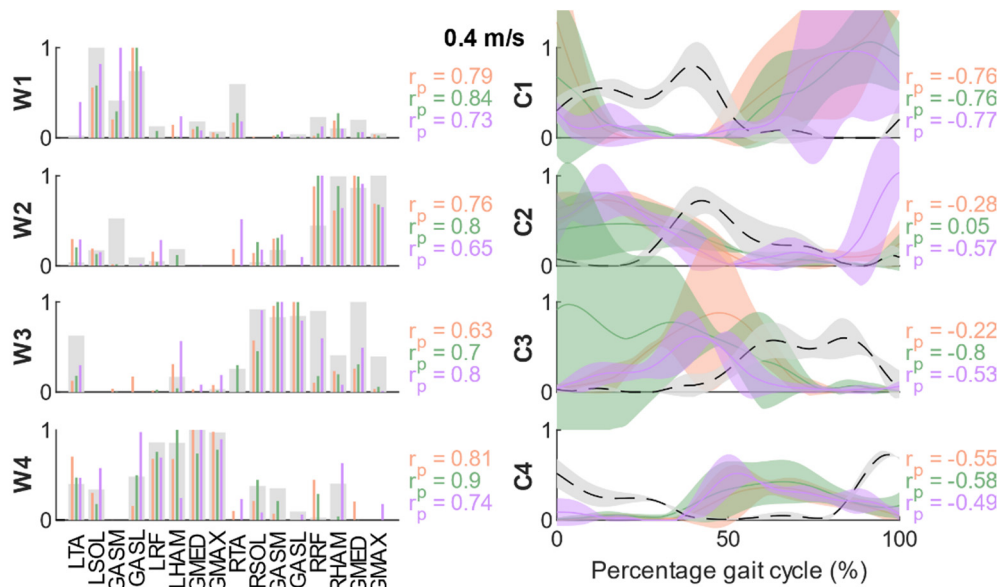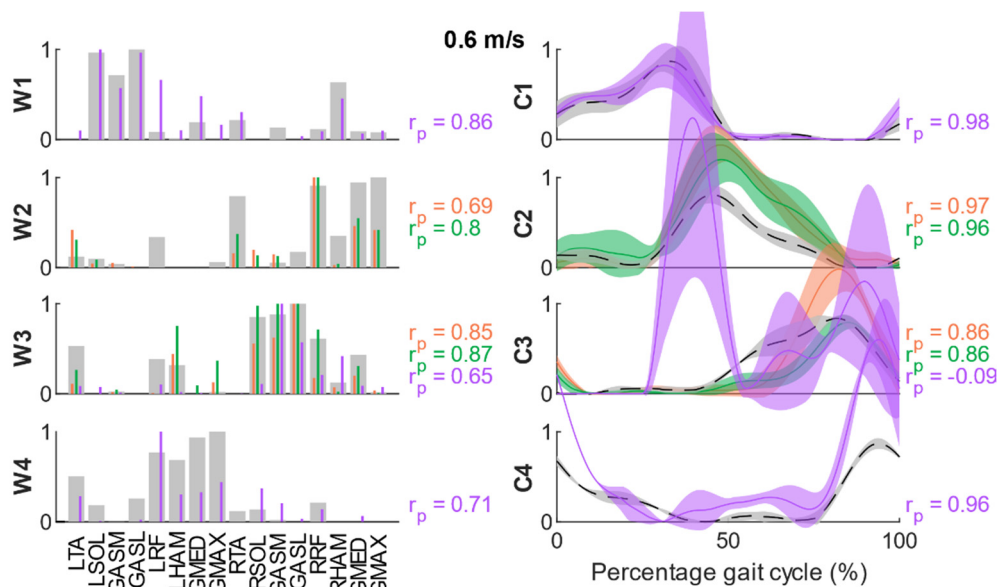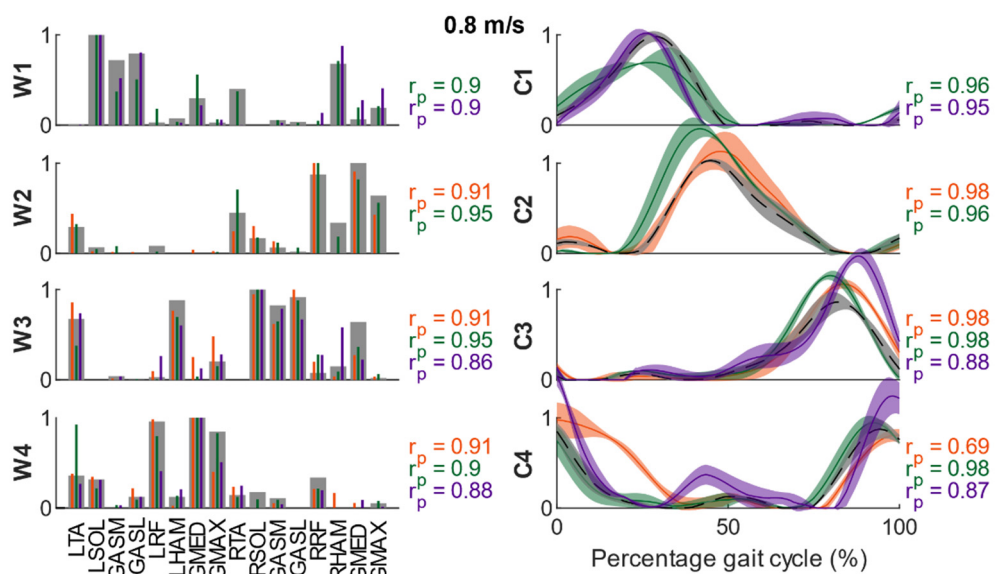

## Subject 03

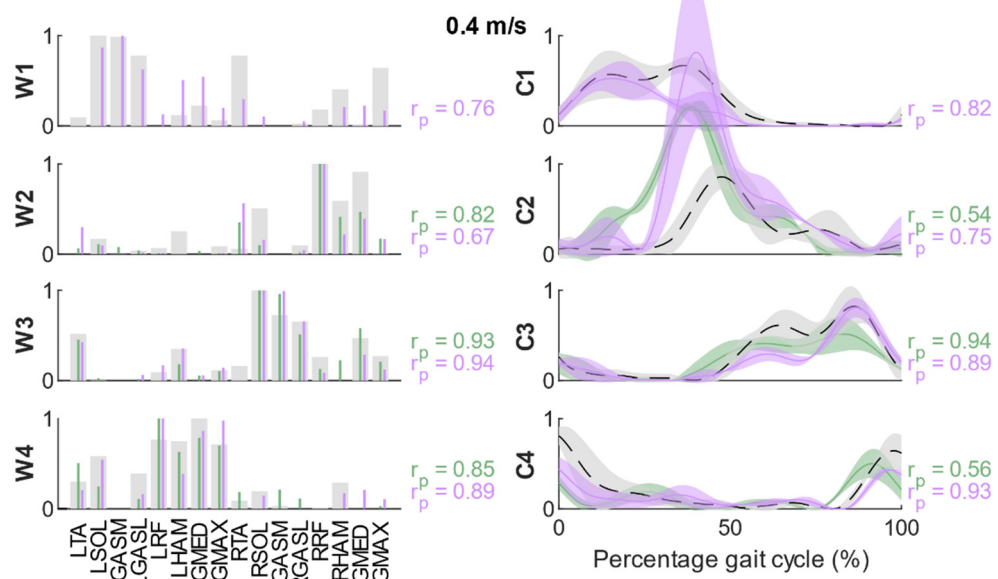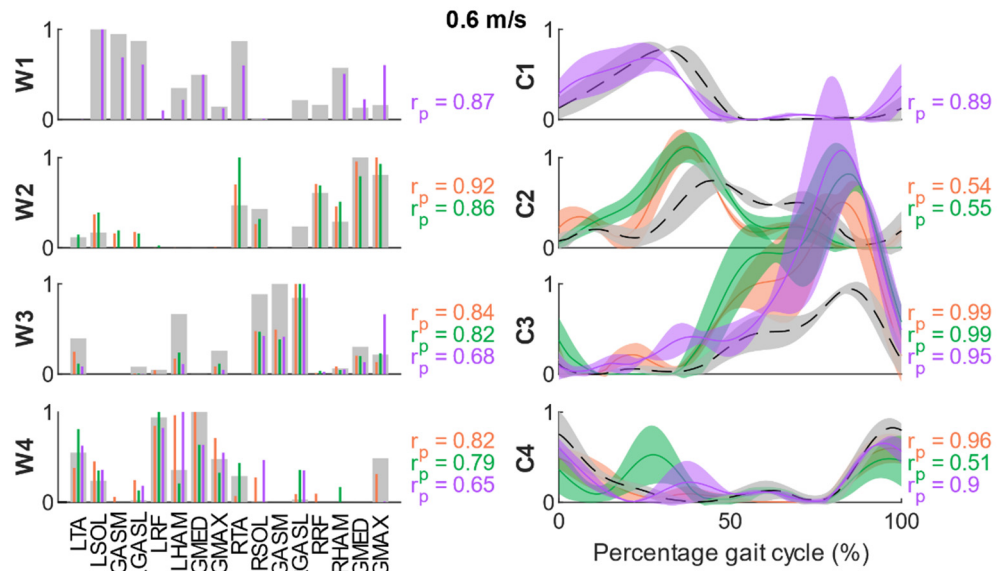



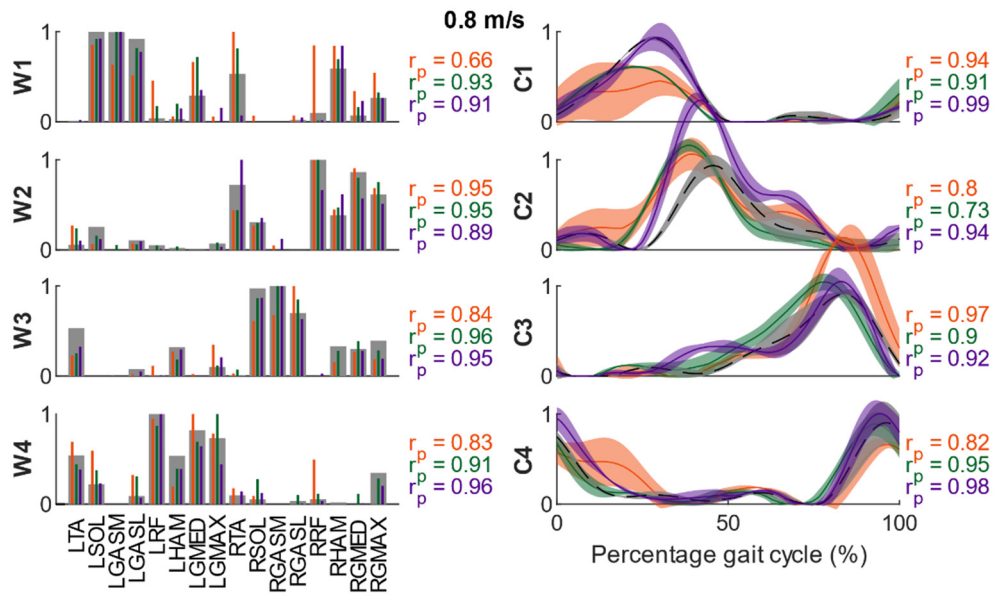

**Subject 04**

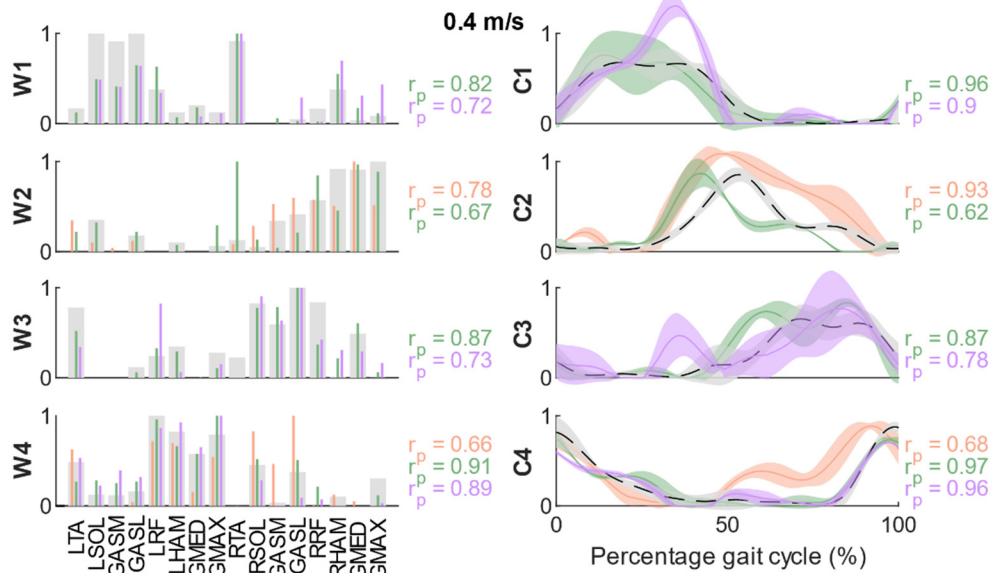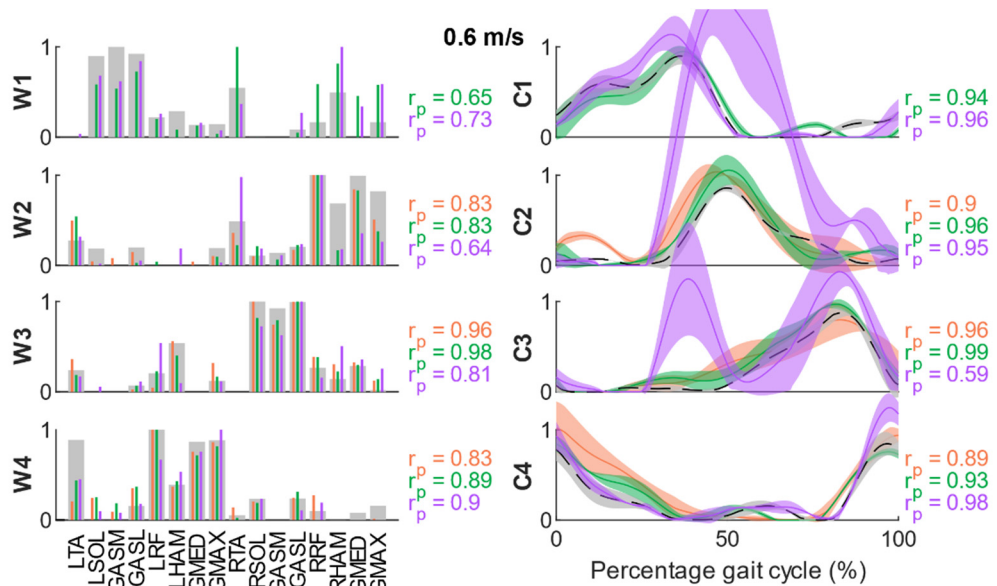

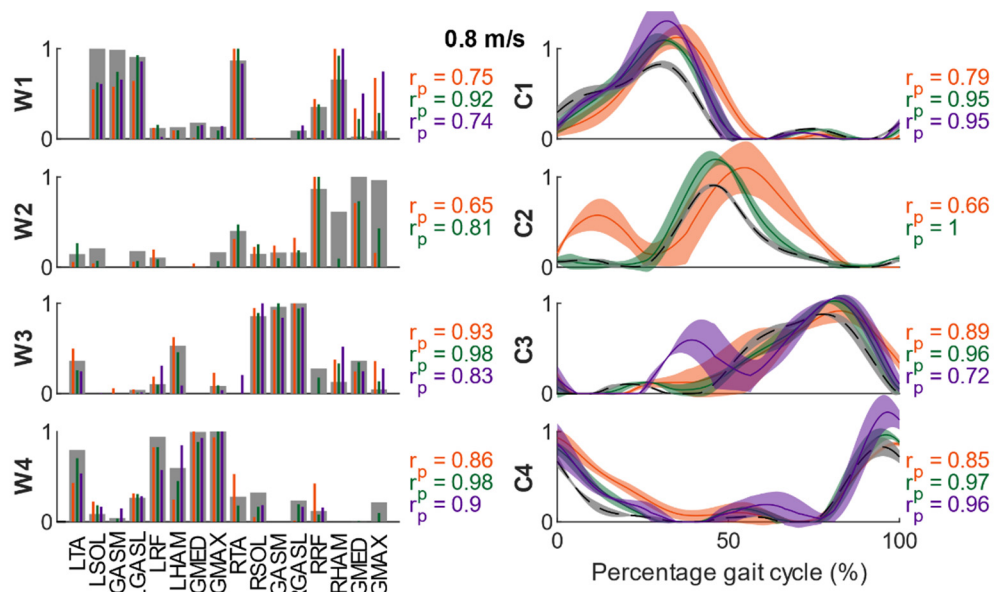

**Subject 05**

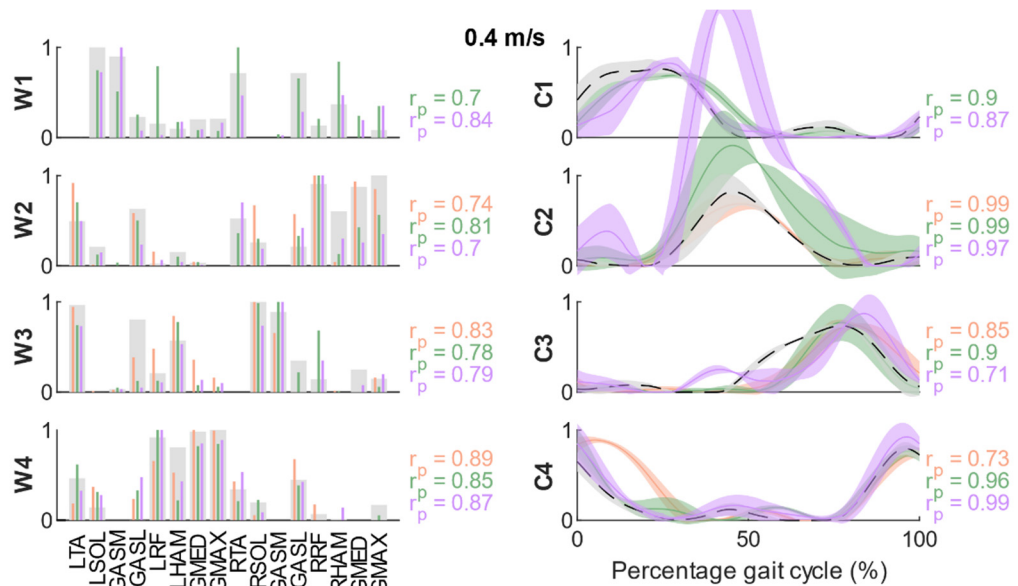

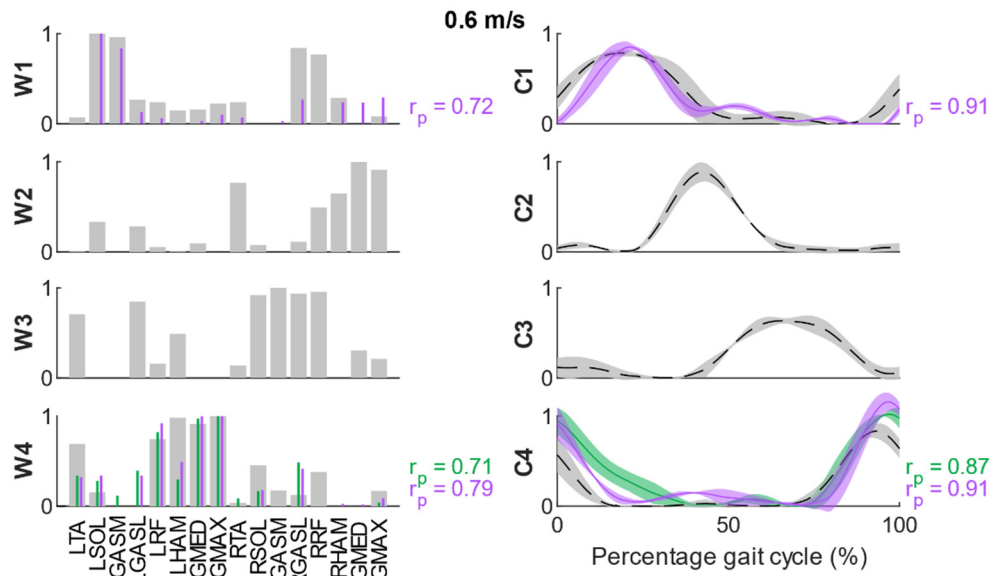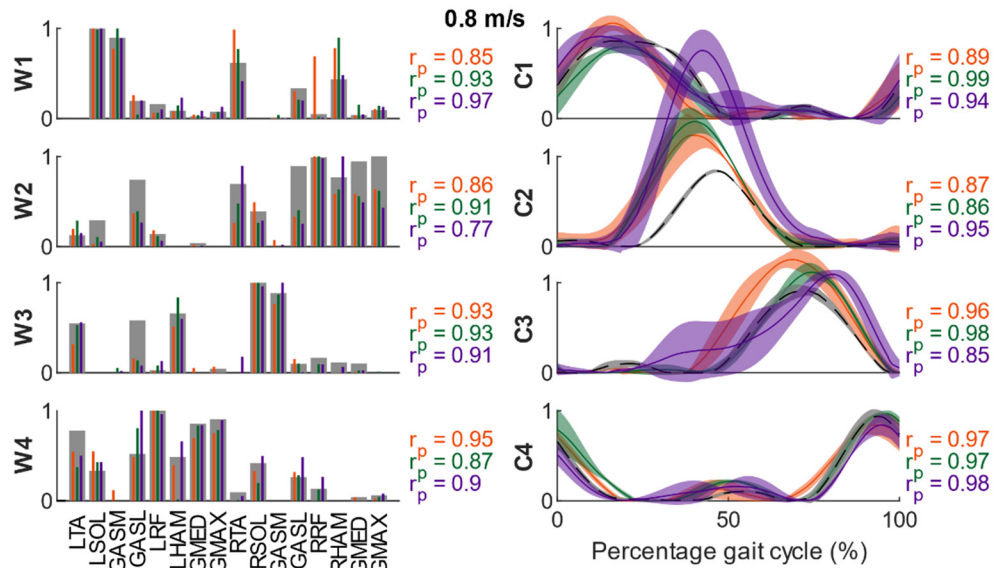

Subject 06

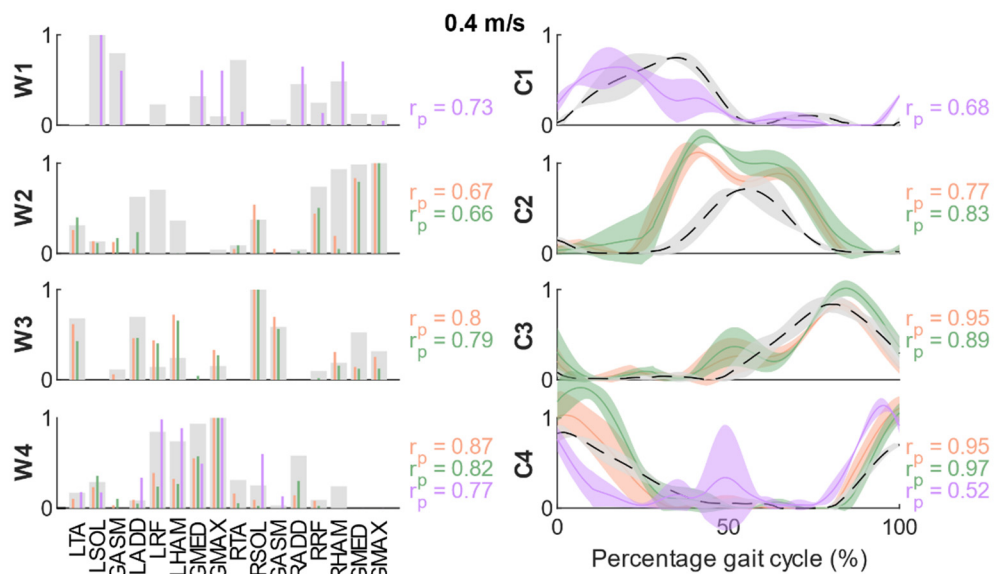

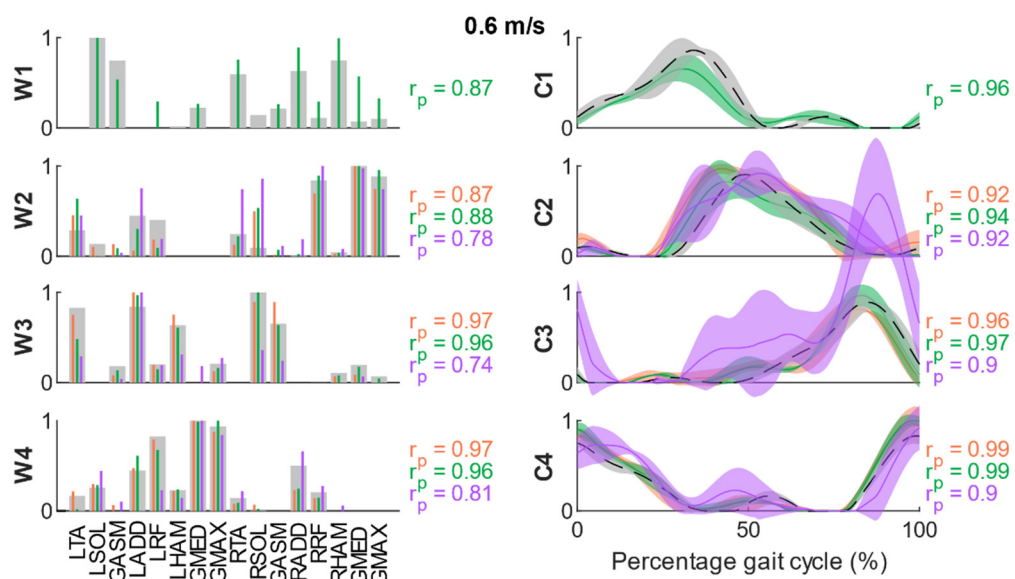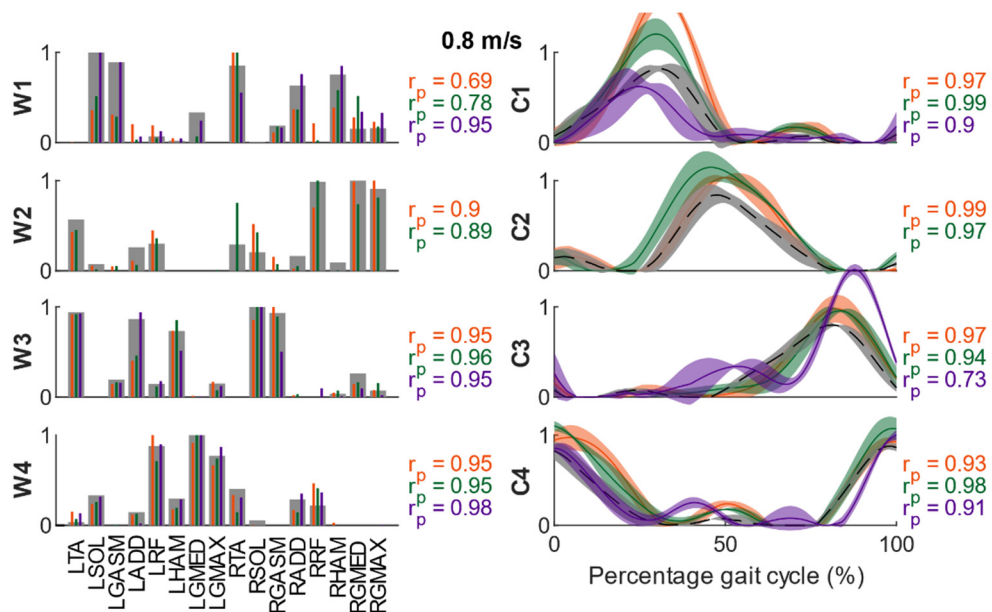

Subject 07

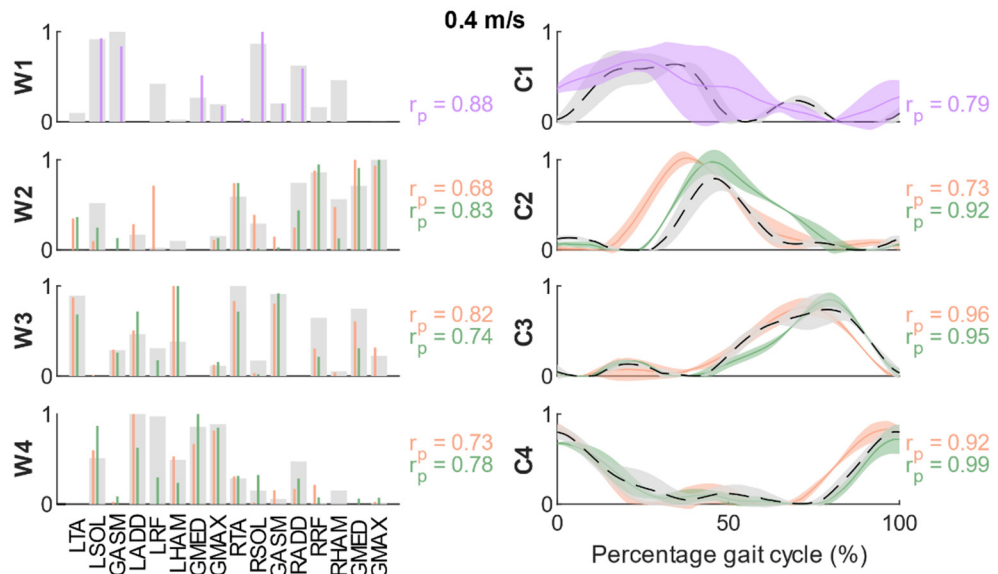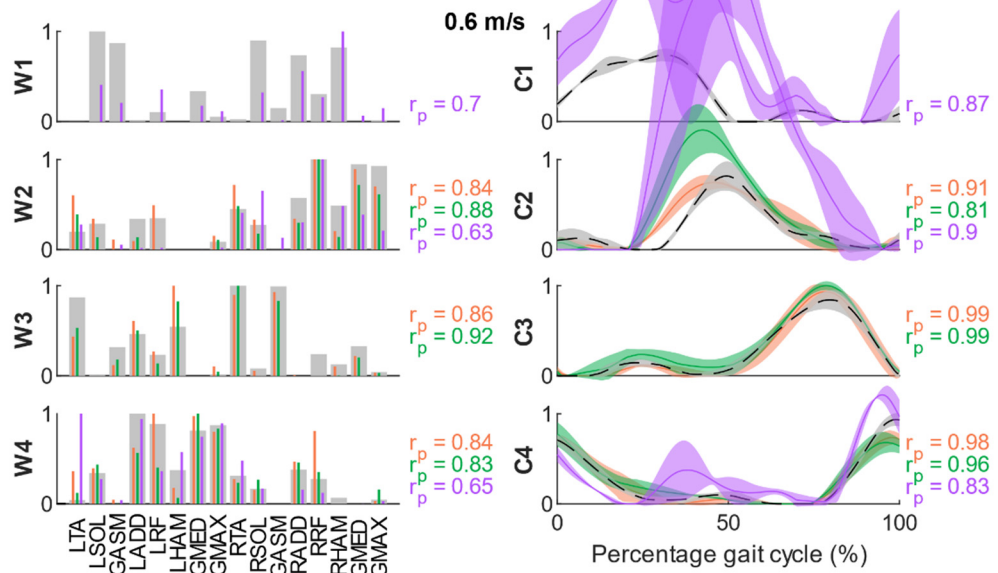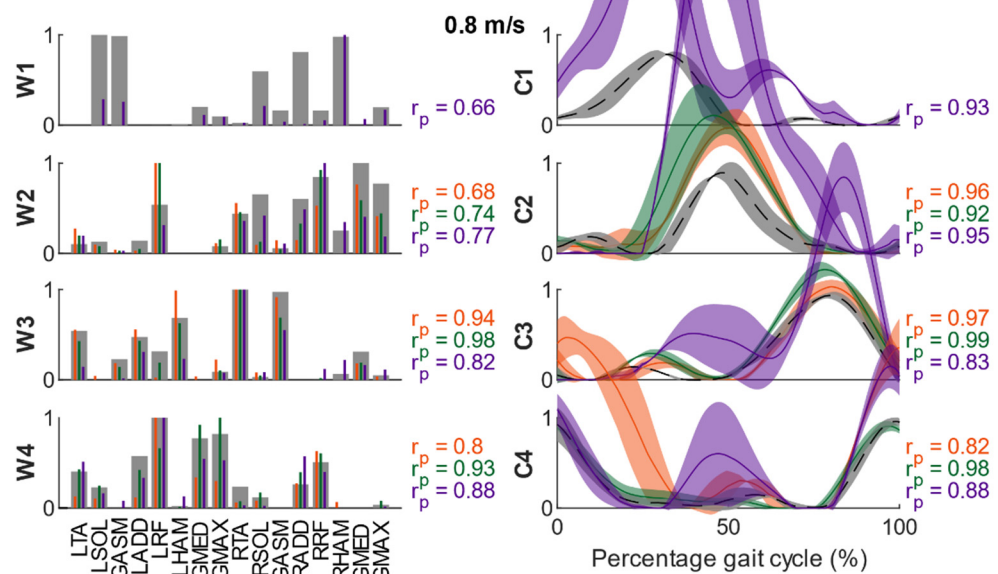



## Subject 08

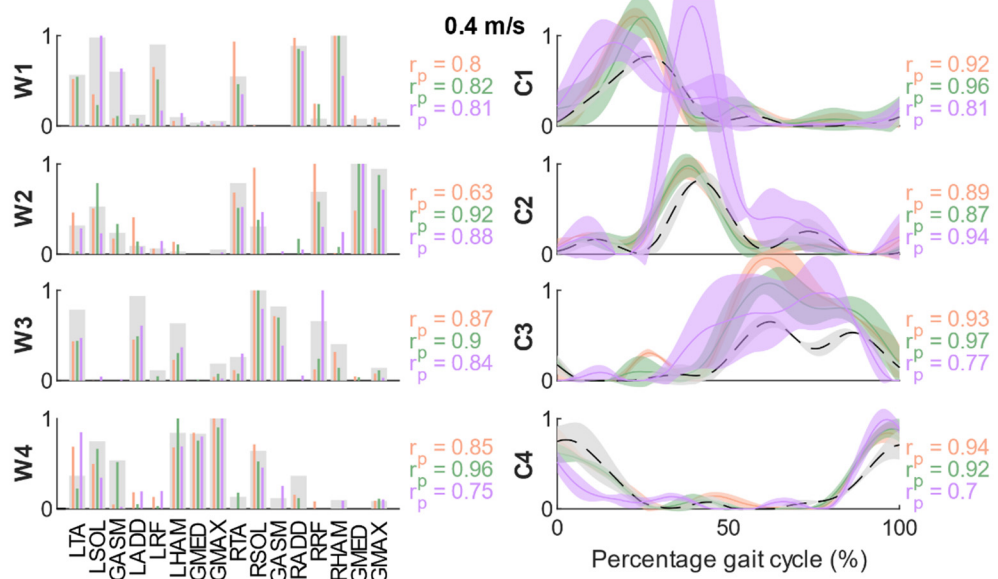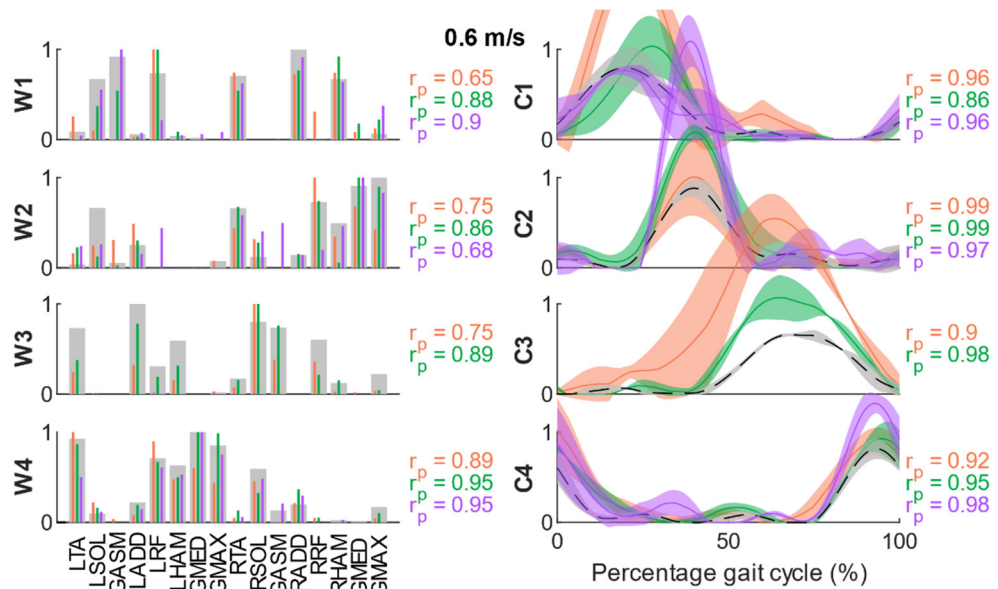

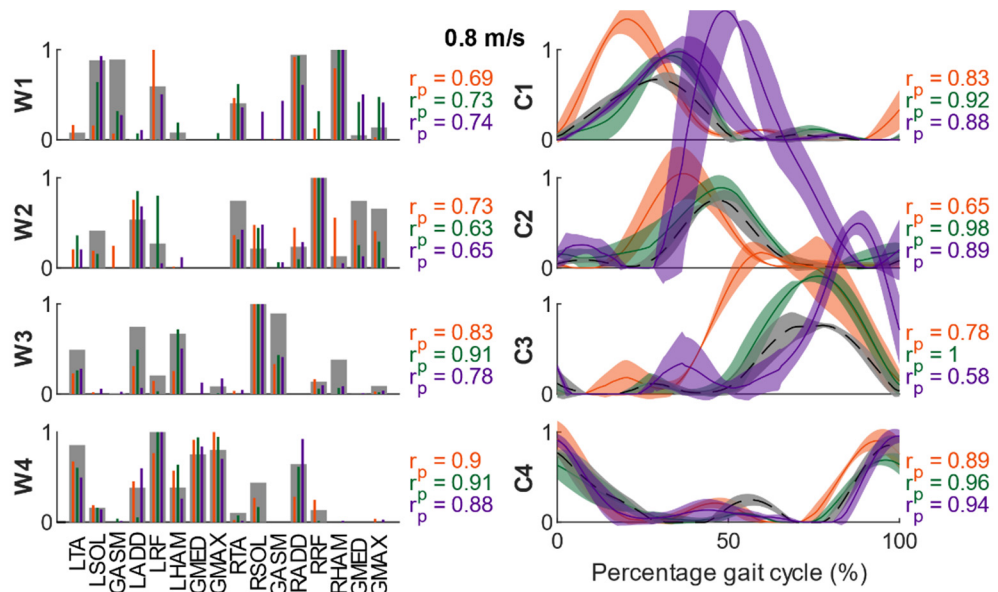

Subject 09

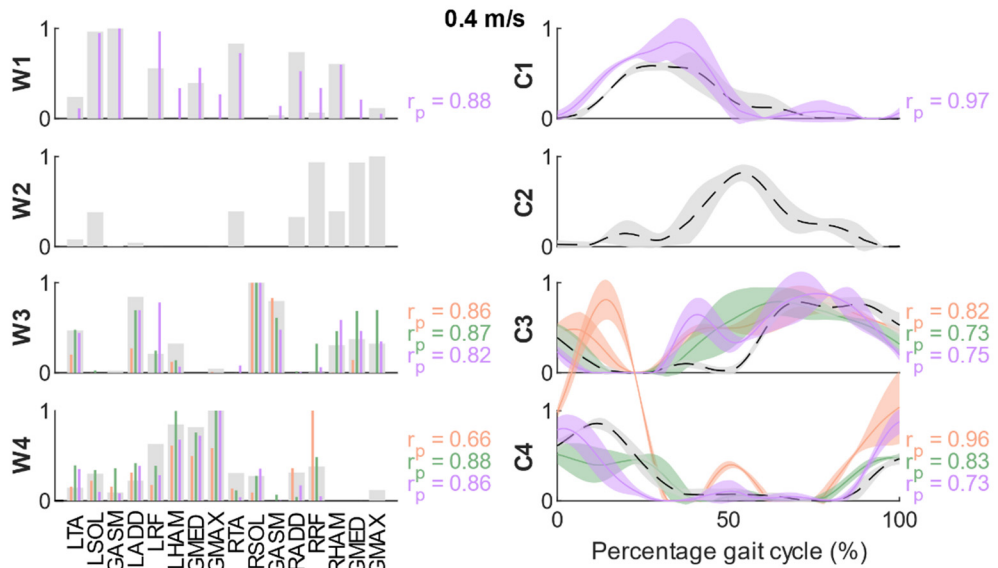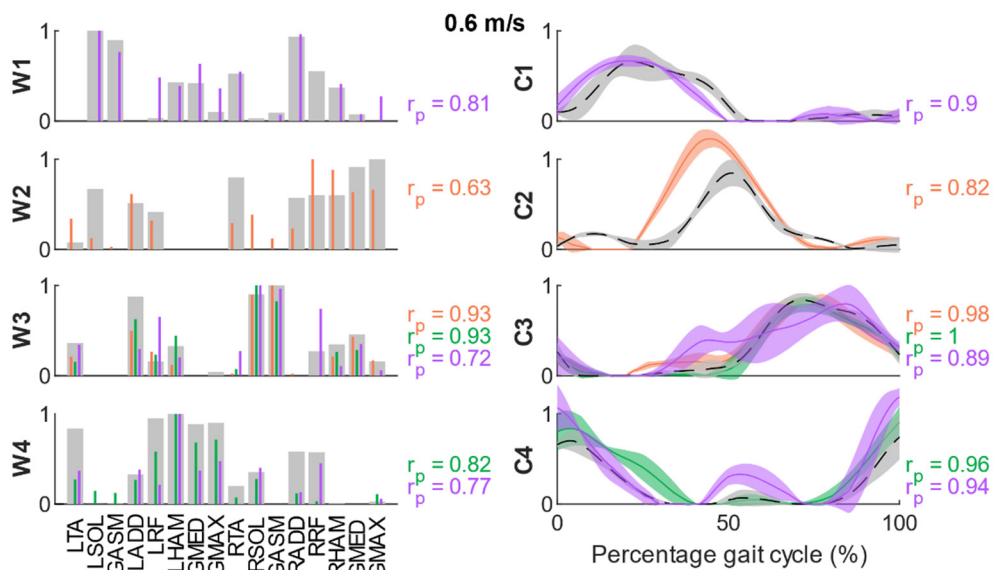

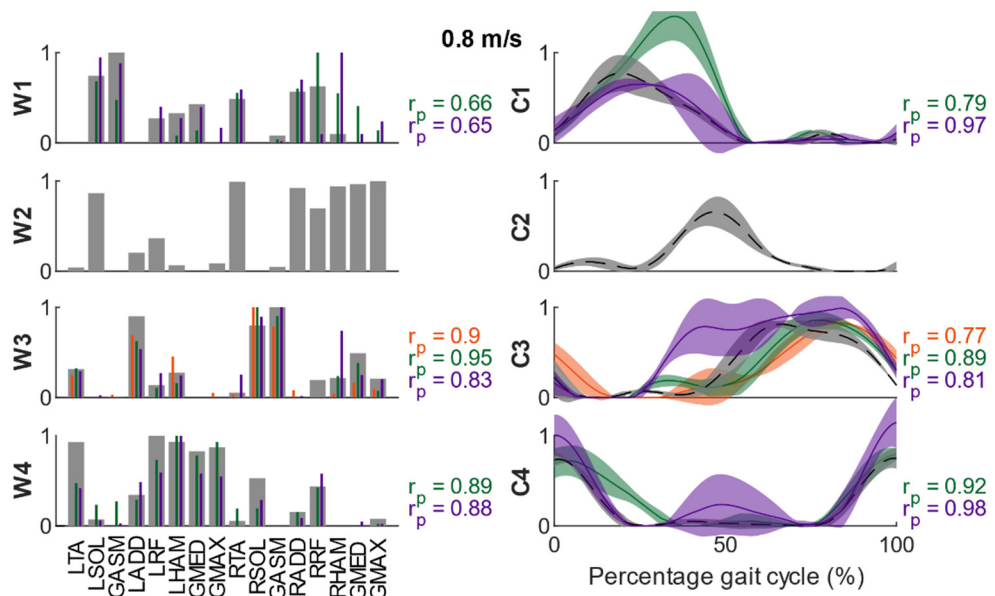

**Subject 10**

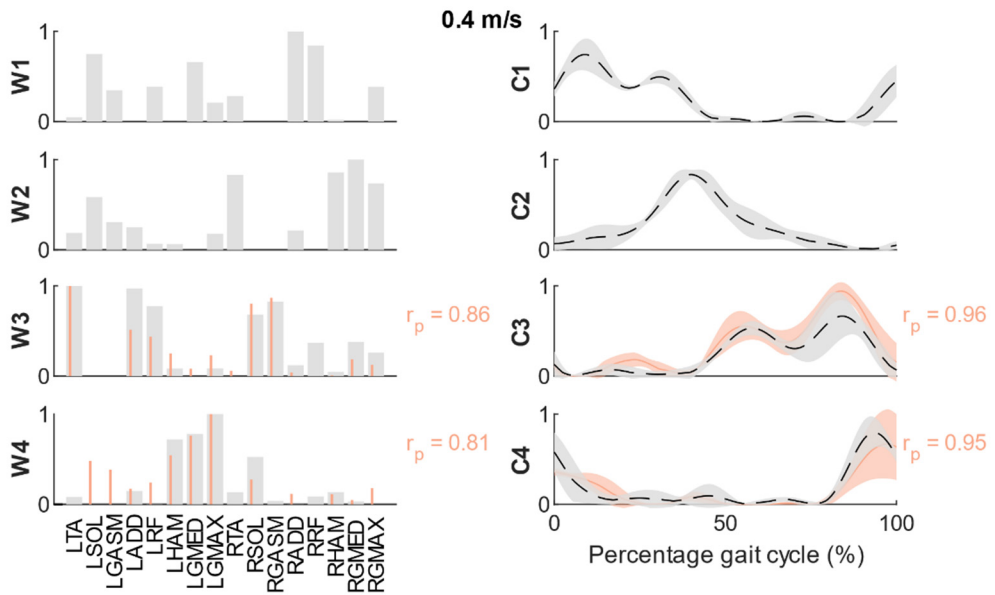

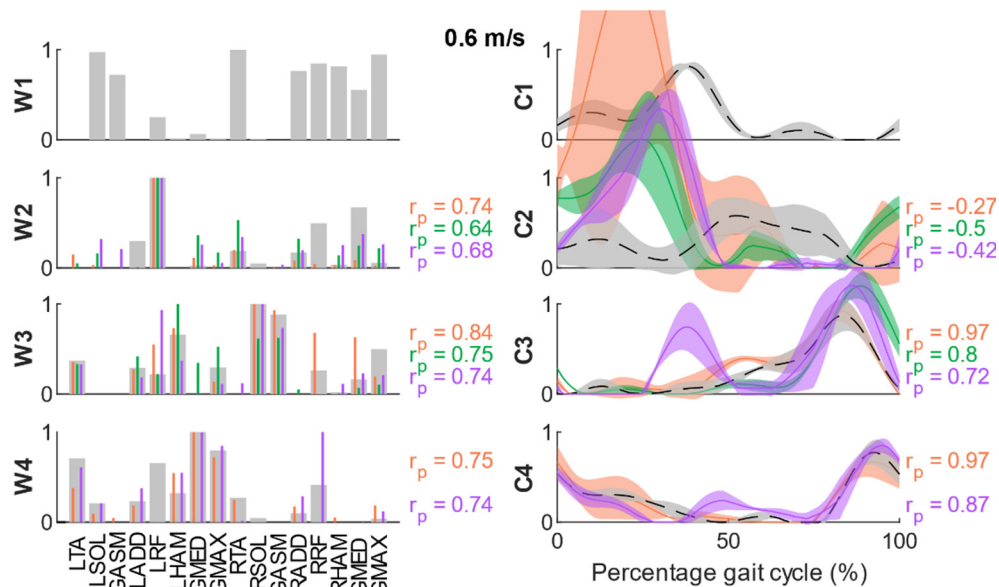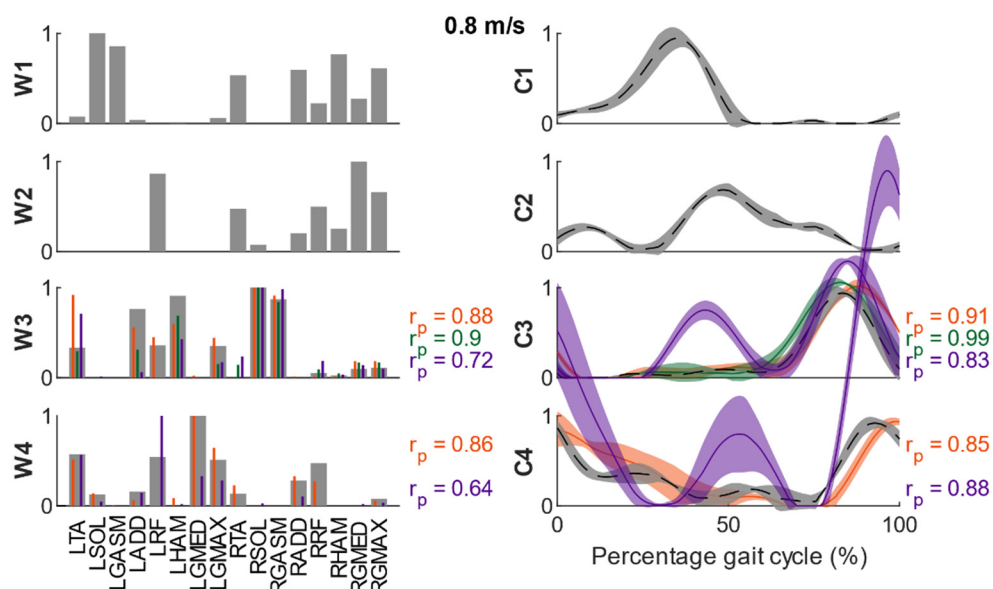

**Subject 11**

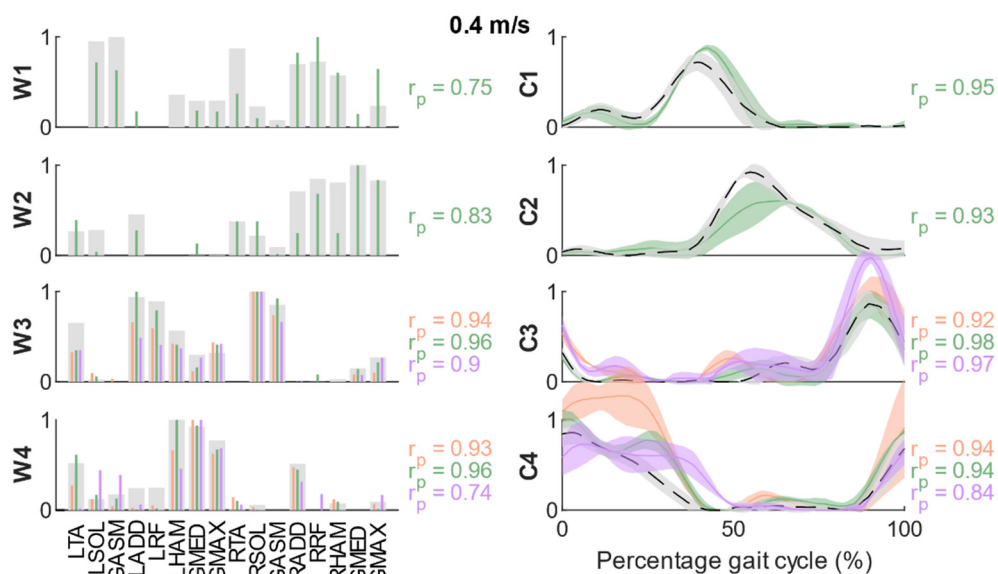

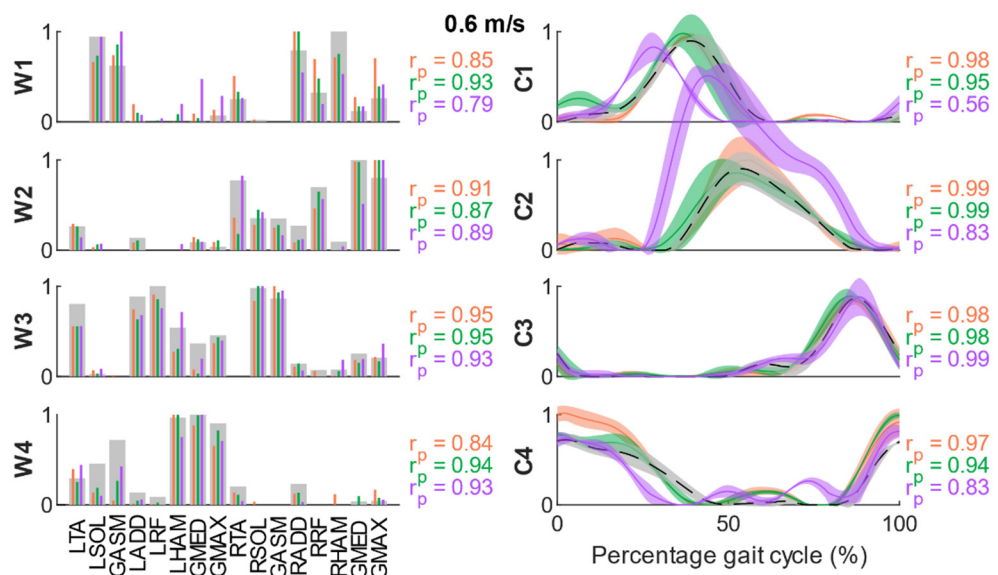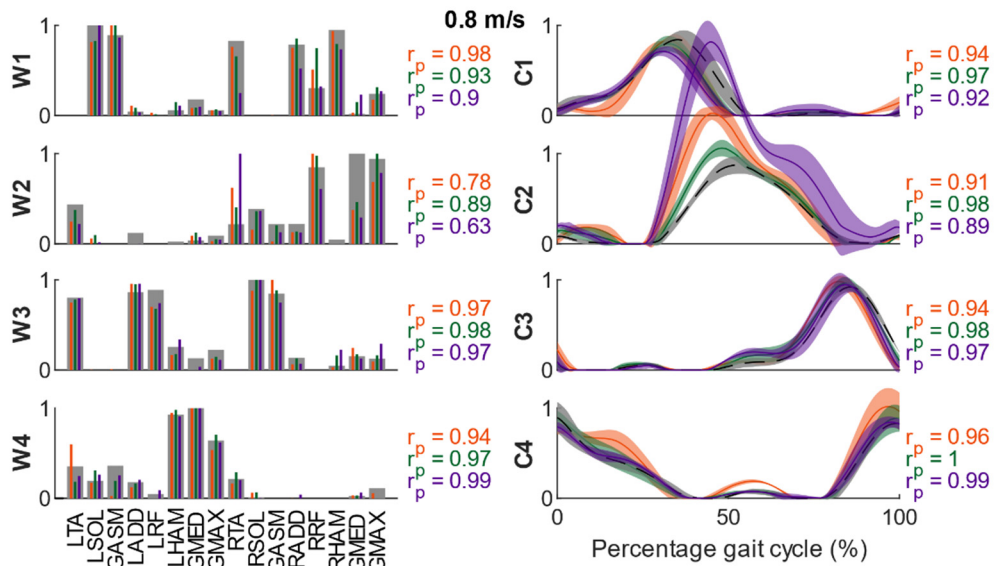

Subject 12



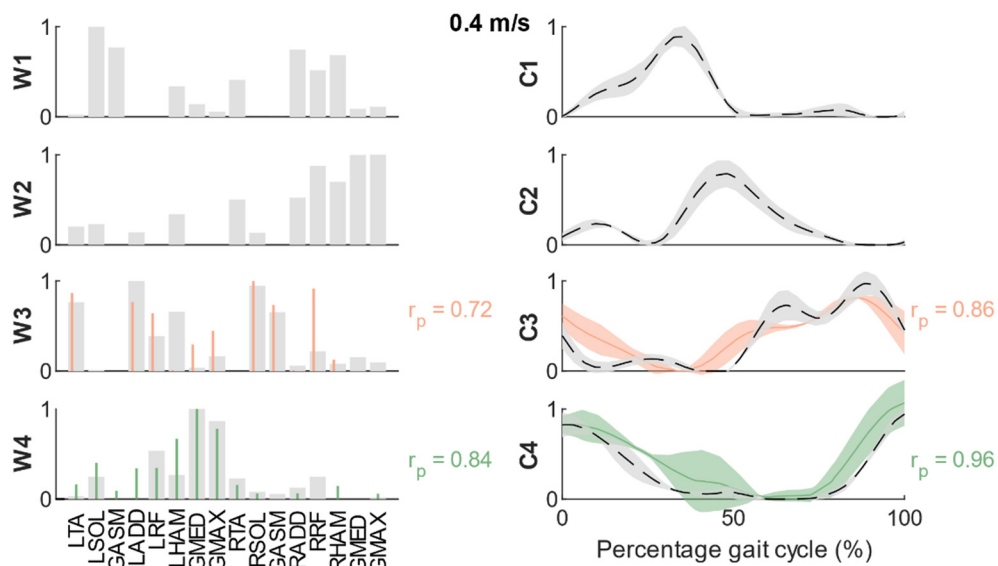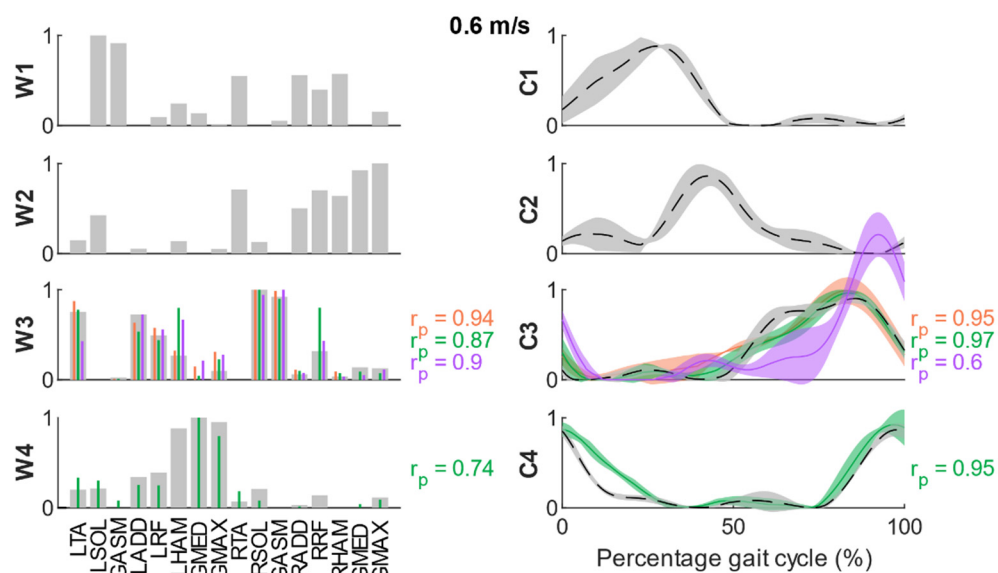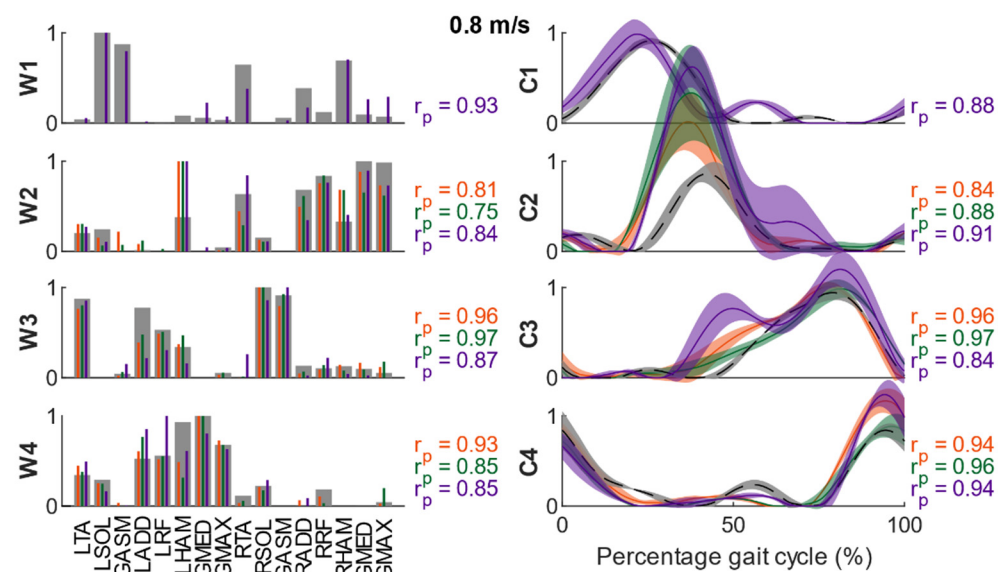

Supplement: s1 [file s1]
